# Supplementary material
Source: PubMed Central journal article supplement (PMC6557118)

In the format provided by the authors and unedited.

# Autophagic cell death restricts chromosomal instability during replicative crisis

Joe Nassour<sup>1</sup>, Robert Radford<sup>1</sup>, Adriana Correia<sup>1</sup>, Javier Miralles Fusté<sup>1</sup>, Brigitte Schoell<sup>2</sup>, Anna Jauch<sup>2</sup>, Reuben J. Shaw<sup>1</sup> & Jan Karlseder<sup>1\*</sup>

---

<sup>1</sup>The Salk Institute for Biological Studies, La Jolla, CA, USA. <sup>2</sup>Institute of Human Genetics, University of Heidelberg, Heidelberg, Germany. \*e-mail: karlseder@salk.edu

Figure 1b (HMECs)

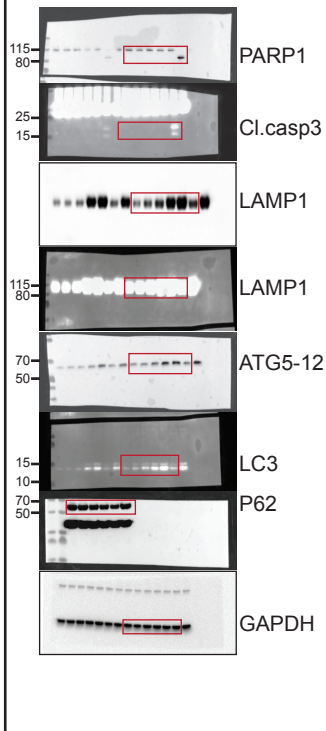

Figure 1b (IMR90E6E7)

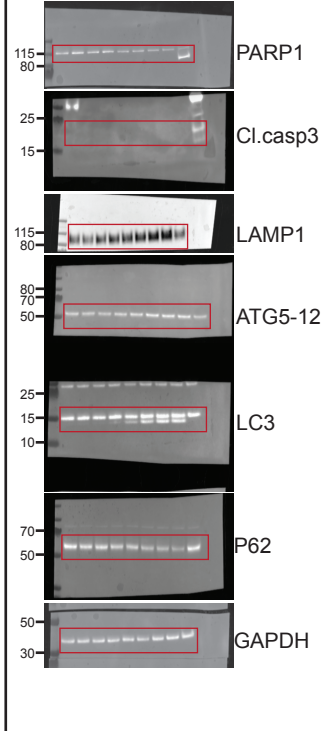

Figure 1b (HMECs)

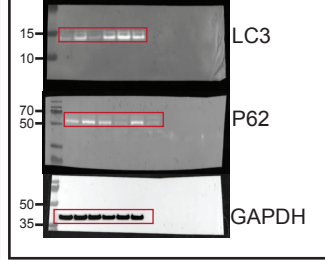

Figure 1b (IMR90E6E7)

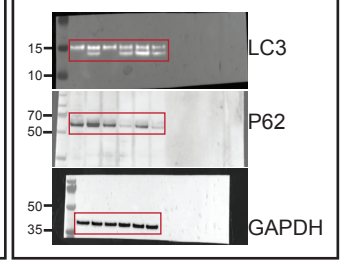

Figure 3a (HMECs)

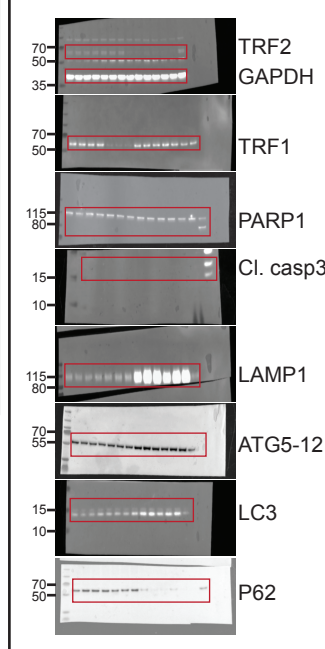

Figure 3a (IMR90E6E7)

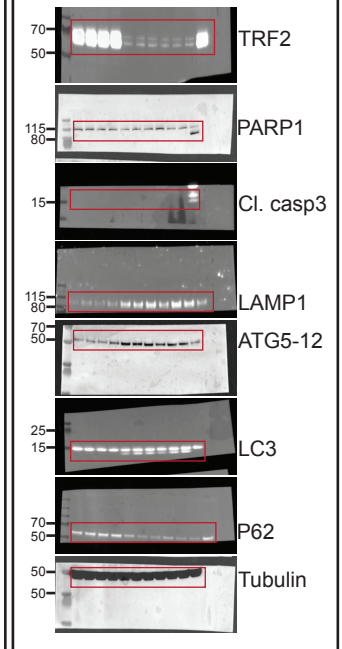

Figure 3d

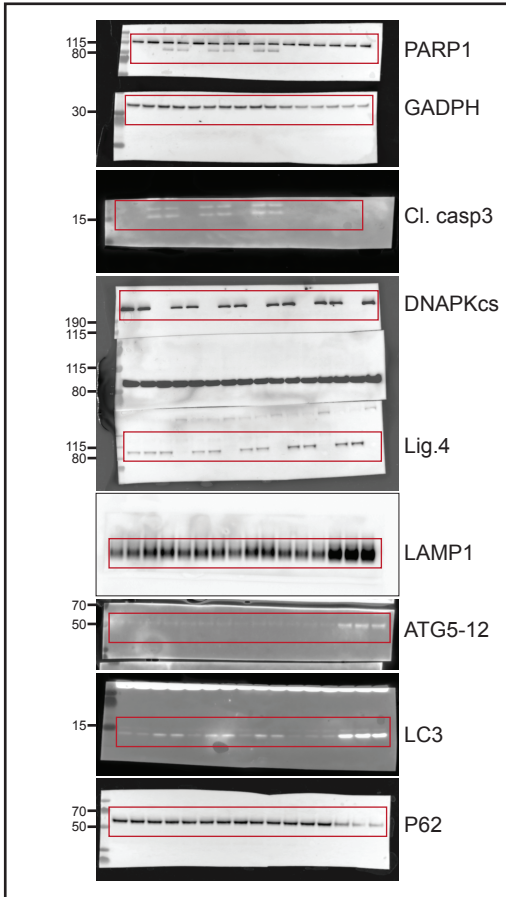

Figure 4e

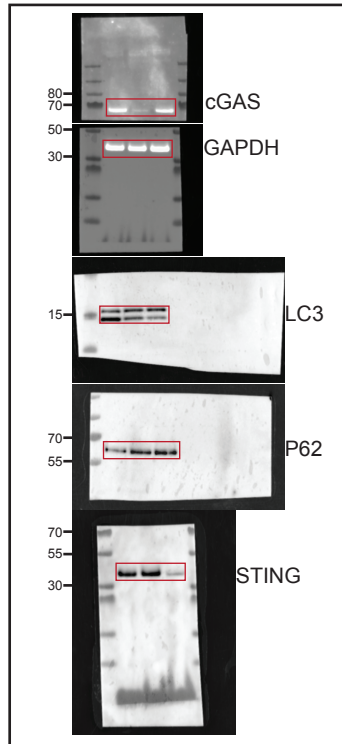

ED figure 1b

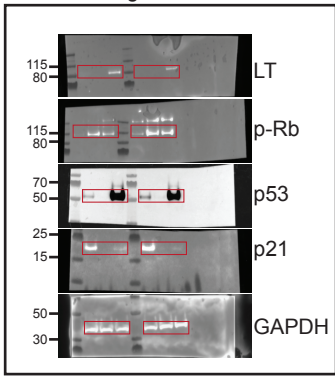

ED figure 1d

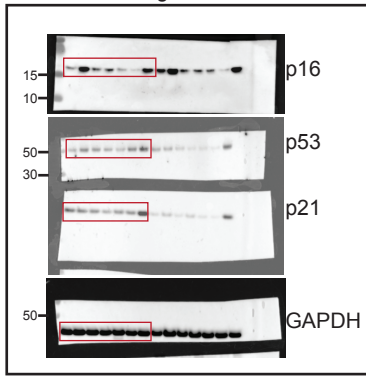

ED figure 5a

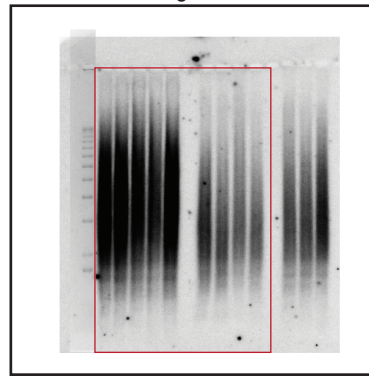

ED figure 1e

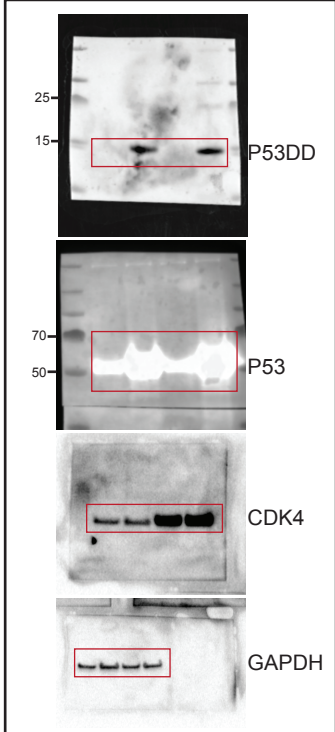

ED figure 6c (HMECs)

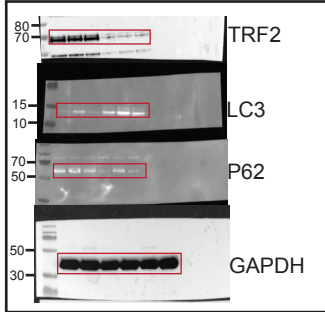

ED figure 6c (IMR90E6E7)

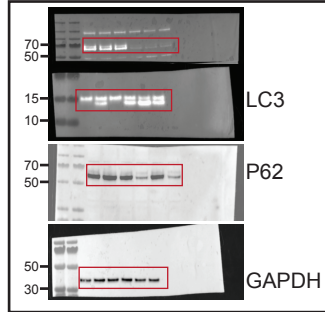

ED figure 7e (HMECs)

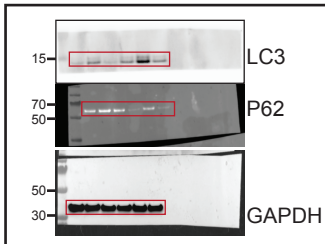

ED figure 7e (IMR90E6E7)

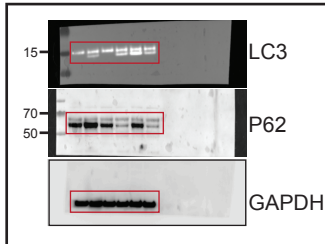

ED figure 9a

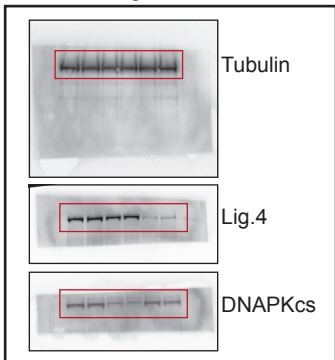

ED figure 9g

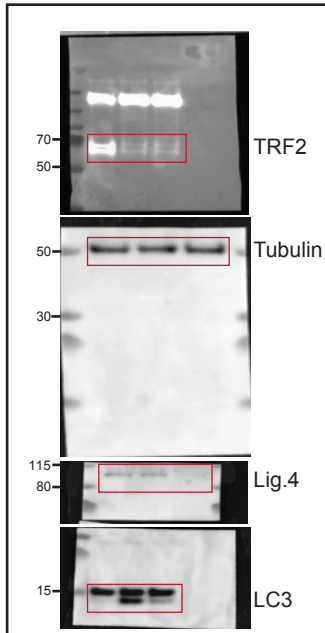

ED figure 4a (HMECs)

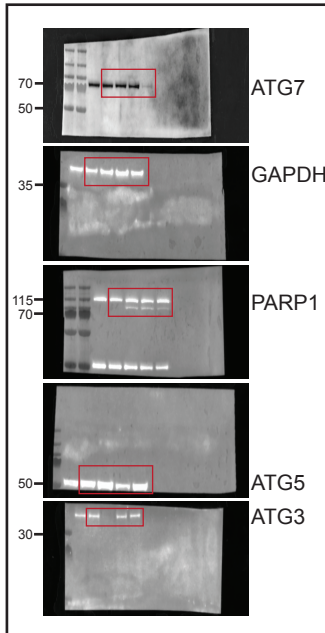

ED figure 4a (IMR90E6E7)

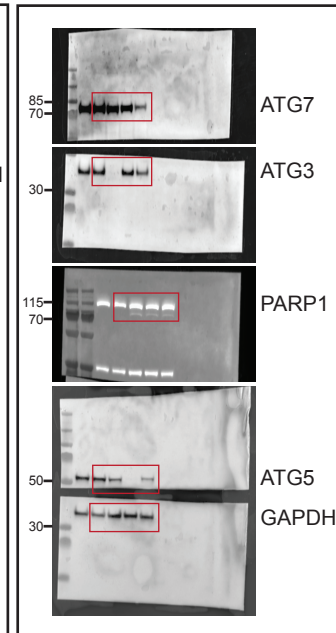

Figure 7d

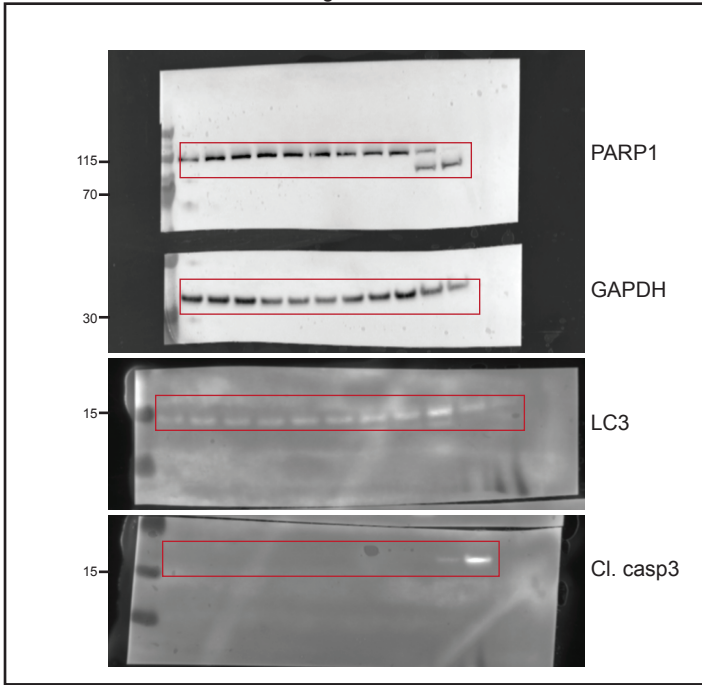

Supplement: NIHMS1018342-supplement-Supplementary_Figure_1.pdf [file NIHMS1018342-supplement-Supplementary_Figure_1.pdf]
