# Supplementary material
Source: PubMed Central journal article supplement (PMC6557118)
Supplement: NIHMS1018342-supplement-Supplementary_Table_1.pdf [file NIHMS1018342-supplement-Supplementary_Table_1.pdf]

## Day 0

## Mock

Image 01: 46,XX

Image 02: 46,XX

Image 03: 46,XX

Image 04: 46,XX

Image 05: 46,XX

Image 06: 46,XX

Image 07: 46,XX

Image 08: 46,XX

Image 09: 46,XX

Image 10: 46,XX

Image 11: 46,XX

Image 12: 46,XX

Image 13: 46,XX

Image 14: 46,XX

Image 15: 46,XX

Image 16: 46,XX

Image 17: 46,XX

Image 18: 46,XX

Image 19: 46,XX

Image 20: 46,XX

Day 40

Mock

| Chromosome | Image 1<br>(n=46)         | Image 2<br>(n=44)          | Image 3<br>(n=45)          | Image 4<br>(n=44)          |
|------------|---------------------------|----------------------------|----------------------------|----------------------------|
| 1          | 1 x2                      | 1 x2                       | 1 x2                       | 1 x2                       |
| 2          | 2 x2                      | 2 x2                       | 2 x2                       | 2 x2                       |
| 3          | 3 x2                      | 3 x2                       | 3 x2                       | 3 x1<br>der(3)t(3;9)x1     |
| 4          | 4 x2                      | 4 x2                       | 4 x2                       | 4 x2                       |
| 5          | 5 x2                      | 5 x2                       | 5 x2                       | 5 x2                       |
| 6          | 6 x2                      | 6 x2                       | 6 x2                       | 6 x2                       |
| 7          | 7 x2                      | 7 x2                       | 7 x2                       | 7 x2                       |
| 8          | 8 x2                      | 8 x2                       | 8 x2                       | 8 x2                       |
| 9          | 9 x2                      | 9 x2                       | 9 x2                       | 9 x1                       |
| 10         | 10 x2                     | 10 x1                      | 10 x2                      | 10 x2                      |
| 11         | 11 x2                     | 11 x2                      | 11 x2                      | 11 x2                      |
| 12         | 12 x2                     | 12 x2                      | 12 x2                      | 12 x2                      |
| 13         | 13 x2                     | 13 x2                      | 13 x1                      | 13 x2                      |
| 14         | 14 x2                     | 14 x2                      | 14 x2                      | 14 x2                      |
| 15         | 15 x2                     | 15 x2                      | 15 x2                      | 15 x1<br>der(15)t(15;19)x1 |
| 16         | 16 x2                     | 16 x2                      | 16 x2                      | 16 x2                      |
| 17         | 17 x2                     | 17 x1                      | 17 x2                      | 17 x1                      |
| 18         | 18 x2                     | 18 x2                      | 18 x2                      | 18 x2                      |
| 19         | 19 x1<br>der(19)t(3;19)x1 | 19 x1<br>der(19)t(10;19)x1 | 19 x1<br>der(19)t(13;19)x1 | 19 x2                      |
| 20         | 20 x2                     | 20 x2                      | 20 x2                      | 20 x2                      |
| 21         | 21 x2                     | 21 x2                      | 21 x2                      | 21 x2                      |
| 22         | 22 x2                     | 22 x2                      | 22 x2                      | 22 x2                      |
| X          | X x2                      | X x2                       | X x2                       | X x2                       |

| Chromosome | Image 5<br>(n=45)         | Image 6<br>(n=41)               | Image 7<br>(n=45)          | Image 8<br>(n=45)         |
|------------|---------------------------|---------------------------------|----------------------------|---------------------------|
| 1          | 1 x2                      | 1 x2                            | 1 x2                       | 1 x2                      |
| 2          | 2 x2                      | 2 x2                            | 2 x2                       | 2 x2                      |
| 3          | 3 x2                      | 3 x2                            | 3 x2                       | 3 x2                      |
| 4          | 4 x2                      | 4 x1                            | 4 x2                       | 4 x2                      |
| 5          | 5 x2                      | 5 x2                            | 5 x2                       | 5 x2                      |
| 6          | 6 x2                      | 6 x1<br>der(6)t(4;6)x1          | 6 x2                       | 6 x2                      |
| 7          | 7 x1                      | 7 x1<br>del(7q)x1               | 7 x2                       | 7 x1                      |
| 8          | 8 x2                      | 8 x2                            | 8 x2                       | 8 x2                      |
| 9          | 9 x2                      | 9 x2                            | 9 x2                       | 9 x2                      |
| 10         | 10 x2                     | 10 x1<br>der(10)t(20;7;20;10)x1 | 10 x2                      | 10 x2                     |
| 11         | 11 x2                     | 11 x2                           | 11 x1<br>der(11)t(11;13)x1 | 11 x2                     |
| 12         | 12 x1<br>der(12)t(X;12)x1 | 12 x1                           | 12 x2                      | 12 x2                     |
| 13         | 13 x2                     | 13 x2                           | 13 x1                      | 13 x2                     |
| 14         | 14 x2                     | 14 x2                           | 14 x2                      | 14 x1<br>der(14)t(6;14)x1 |
| 15         | 15 x2                     | 15 x2                           | 15 x2                      | 15 x2                     |
| 16         | 16 x2                     | 16 x2                           | 16 x2                      | 16 x2                     |
| 17         | 17 x2                     | 17 x1<br>der(17)t(1;17)x1       | 17 x2                      | 17 x2                     |
| 18         | 18 x2                     | 18 x2                           | 18 x2                      | 18 x2                     |
| 19         | 19 x1<br>der(19)t(7;19)x1 | 19 x1                           | 19 x2                      | 19 x2                     |
| 20         | 20 x2                     | 20 x1                           | 20 x2                      | 20 x2                     |
| 21         | 21 x2                     | 21 x2                           | 21 x2                      | 21 x2                     |
| 22         | 22 x2                     | 22 x1                           | 22 x2                      | 22 x2                     |
| X          | X x1<br>? del(X)x1        | X x2                            | X x2                       | X x2                      |

| Chromosome | Image 9<br>(n=46)       | Image 10<br>(n=45)        | Image 11<br>(n=44)                             | Image 12<br>(n=46)         |
|------------|-------------------------|---------------------------|------------------------------------------------|----------------------------|
| 1          | 1 x2                    | 1 x2                      | 1 x2                                           | 1 x2                       |
| 2          | 2 x2                    | 2 x1<br>t(2;16)x1         | 2 x2                                           | 2 x2                       |
| 3          | 3 x1<br>der(3)t(3;17)x1 | 3 x2                      | 3 x2                                           | 3 x2                       |
| 4          | 4 x2                    | 4 x2                      | 4 x2                                           | 4 x2                       |
| 5          | 5 x2                    | 5 x2                      | 5 x2                                           | 5 x2                       |
| 6          | 6 x2                    | 6 x2                      | 6 x2                                           | 6 x2                       |
| 7          | 7 x2                    | 7 x1                      | 7 x2                                           | 7 x2                       |
| 8          | 8 x2                    | 8 x2                      | 8 x2                                           | 8 x2                       |
| 9          | 9 x2                    | 9 x1<br>der(9)t(9;7;15)x2 | 9 x1<br>del(9q)x1                              | 9 x1<br>der(9)t(9;15)x1    |
| 10         | 10 x2                   | 10 x2                     | 10 x2                                          | 10 x2                      |
| 11         | 11 x2                   | 11 x2                     | 11 x2                                          | 11 x2                      |
| 12         | 12 x2                   | 12 x2                     | -<br>der(12)t(20;12;12)x1<br>der(12)t(12;21)x1 | 12 x2                      |
| 13         | 13 x2                   | 13 x3                     | 13 x2                                          | 13 x2                      |
| 14         | 14 x2                   | 14 x2                     | 14 x2                                          | 14 x2                      |
| 15         | 15 x2                   | 15 x1                     | 15 x1<br>der(15)t(9;15)x1                      | 15 x2                      |
| 16         | 16 x2                   | 16 x1<br>t(2;16)x1        | 16 x2                                          | 16 x2                      |
| 17         | 17 x2                   | 17 x2                     | 17 x2                                          | 17 x2                      |
| 18         | 18 x2                   | 18 x2                     | 18 x2                                          | 18 x2                      |
| 19         | 19 x2                   | 19 x2                     | -<br>der(19)t(19;20;19)x1                      | 19 x2                      |
| 20         | 20 x2                   | 20 x1                     | 20 x1                                          | 20 x2                      |
| 21         | 21 x2                   | 21 x2                     | 21 x2                                          | 21 x2                      |
| 22         | 22 x2                   | 22 x2                     | 22 x2                                          | 22 x1<br>der(22)t(17;22)x1 |
| X          | X x2                    | X x2                      | X x2                                           | X x2                       |

| Chromosome | Image 13<br>(n=44)           | Image 14<br>(n=44) | Image 15<br>(n=47)  | Image 16<br>(n=45)      |
|------------|------------------------------|--------------------|---------------------|-------------------------|
| 1          | 1 x1<br>der(1)t(1;20;3;20)x1 | 1 x2               | 1 x2                | 1 x2                    |
| 2          | 2 x2                         | 2 x2               | 2 x2                | 2 x2                    |
| 3          | 3 x1<br>del(3)x1             | 3 x2               | 3 x2                | 3 x2                    |
| 4          | 4 x2                         | 4 x2               | 4 x2                | 4 x2<br>del(4q)x1       |
| 5          | 5 x2                         | 5 x2               | 5 x2                | 5 x2                    |
| 6          | 6 x2                         | 6 x2               | 6 x2                | 6 x2                    |
| 7          | 7 x2                         | 7 x2               | 7 x2                | 7 x2                    |
| 8          | 8 x2                         | 8 x2               | 8 x2                | 8 x2                    |
| 9          | 9 x2                         | 9 x2               | 9 x2                | 9 x1<br>der(9)t(9;15)x1 |
| 10         | 10 x2                        | 10 x2              | 10 x2               | 10 x2                   |
| 11         | 11 x2                        | 11 x2              | 11 x1<br>del(11q)x1 | 11 x2                   |
| 12         | 12 x2                        | 12 x2              | 12 x2               | 12 x2                   |
| 13         | 13 x2                        | 13 x2              | 13 x2               | 13 x2                   |
| 14         | 14 x2                        | 14 x2              | 14 x2               | 14 x2                   |
| 15         | 15 x2                        | 15 x2              | 15 x2               | 15 x2                   |
| 16         | 16 x1<br>der(16)t(16;17)x1   | 16 x2              | 16 x2               | 16 x2                   |
| 17         | 17 x1                        | 17 x2              | 17 x2               | 17 x2                   |
| 18         | 18 x2                        | 18 x2              | 18 x2               | 18 x2                   |
| 19         | 19 x2                        | 19 x2              | 19 x2<br>del(19)x1  | 19 x2                   |
| 20         | 20 x1                        | 20 x2              | 20 x2               | 20 x2                   |
| 21         | 21 x2                        |                    | 21 x2               | 21 x2                   |
| 22         | 22 x2                        | 22 x2              | 22 x2               |                         |
| X          | X x2                         | X x2               | X x2                | X x2                    |

| Chromosome | Image 17<br>(n=45)                          | Image 18<br>(n=46)        | Image 19<br>(n=45)        | Image 20<br>(n=43)        |
|------------|---------------------------------------------|---------------------------|---------------------------|---------------------------|
| 1          | 1 x1<br>del(1q)x1                           | 1 x2                      | 1 x1<br>del(1q)x1         | 1 x2                      |
| 2          | 2 x2                                        | 2 x2                      | 2 x2                      | 2 x2                      |
| 3          | 3 x2                                        | 3 x2                      | 3 x2                      | 3 x2                      |
| 4          | 4 x2                                        | 4 x2                      | 4 x2                      | 4 x2                      |
| 5          | 5 x2                                        | 5 x2                      | 5 x2                      | 5 x2                      |
| 6          | 6 x2                                        | 6 x2                      | 6 x2                      | 6 x1<br>der(6)t(6;22)x1   |
| 7          | 7 x2                                        | 7 x2                      | 7 x2                      | 7 x2                      |
| 8          | 8 x2                                        | 8 x2                      | 8 x2                      | 8 x1<br>der(8)t(8;5;17)x1 |
| 9          | 9 x2                                        | 9 x2                      | 9 x2                      | 9 x2                      |
| 10         | 10 x2                                       | 10 x2                     | 10 x2                     | 10 x2                     |
| 11         | 11 x1                                       | 11 x2                     | 11 x1<br>der(11)t(9;11)x1 | 11 x2                     |
| 12         | 12 x2                                       | 12 x2                     | 12 x2                     | 12 x2                     |
| 13         | 13 x2                                       | 13 x2                     | 13 x1                     | 13 x2                     |
| 14         | 14 x2                                       | 14 x2                     | 14 x2                     | 14 x2                     |
| 15         | 15 x2                                       | 15 x2                     | 15 x2                     | 15 x2                     |
| 16         | 16 x2                                       | 16 x2                     | 16 x2                     | 16 x2                     |
| 17         | 17 x2                                       | 17 x2                     | 17 x2                     | 1<br>del(17q)x1           |
| 18         | 18 x2                                       | 18 x2                     | 18 x2                     | 18 x2                     |
| 19         | 19 x2                                       | 19 x2                     | 19 x2                     | 19 x2                     |
| 20         | 20 x2                                       | 20 x1<br>der(20)t(2;20)x1 | 20 x2                     | 20 x2                     |
| 21         | 21 x2                                       | 21 x2                     | 21 x2                     | 21 x2                     |
| 22         | 1<br>der(22)t(11;22)x1<br>der(22)t(11;22)x1 | 22 x2                     | 22 x2                     | 1                         |
| X          | X x2                                        | X x2                      | X x2                      | X x2                      |

Day 40

sh-scramble

| Chromosome | Image 1<br>(n=45)      | Image 2<br>(n=43)          | Image 3<br>(n=46)         | Image 4<br>(n=44) |
|------------|------------------------|----------------------------|---------------------------|-------------------|
| 1          | 1 x1<br>der(1)t(1;9)x1 | 1 x2                       | 1 x2                      | 1 x2              |
| 2          | 2 x2                   | 2 x1<br>der(2)t(2;10)x1    | 2 x2                      | 2 x2              |
| 3          | 3 x2                   | 3 x2                       | 3 x2                      | 3 x2              |
| 4          | 4 x2                   | 4 x2                       | 4 x2                      | 4 x2              |
| 5          | 5 x2                   | 5 x2                       | 5 x2                      | 5 x2              |
| 6          | 6 x2                   | 6 x2                       | 6 x2                      | 6 x2              |
| 7          | 7 x2                   | 7 x2                       | 7 x1<br>der(7)t(7;17)x1   | 7 x1              |
| 8          | 8 x2                   | 8 x2                       | 8 x2                      | 8 x2              |
| 9          | 9 x2                   | 9 x2                       | 9 x2                      | 9 x1              |
| 10         | 10 x2                  | 10 x2                      | 10 x2                     | 10 x2             |
| 11         | 11 x2                  | 11 x1<br>der(11)t(11;19)x1 | 11 x2                     | 11 x2             |
| 12         | 12 x2                  | 12 x2                      | 12 x2                     | 12 x2             |
| 13         | 13 x2                  | 13 x1<br>der(13)t(13;16)x1 | 13 x2                     | 13 x2             |
| 14         | 14 x2                  | 14 x2                      | 14 x2                     | 14 x2             |
| 15         | 15 x2                  | 15 x2                      | 15 x2                     | 15 x2             |
| 16         | 16 x2                  | 16 x1                      | 16 x2                     | 16 x2             |
| 17         | 17 x2                  | 17 x2                      | 17 x1<br>der(17)t(2;17)x1 | 17 x2             |
| 18         | 18 x2                  | 18 x2                      | 18 x2                     | 18 x2             |
| 19         | 19 x2                  | 19 x1                      | 19 x2                     | 19 x2             |
| 20         | 20 x1                  | 20 x1                      | 20 x2                     | 20 x2             |
| 21         | 21 x2                  | 21 x2                      | 21 x2                     | 21 x2             |
| 22         | 22 x2                  | 22 x2                      | 22 x2                     | 22 x2             |
| X          | X x2                   | X x2                       | X x2                      | X x2              |

| Chromosome | Image 5<br>(n=44)          | Image 6<br>(n=44)         | Image 7<br>(n=44)              | Image 8<br>(n=46)                 |
|------------|----------------------------|---------------------------|--------------------------------|-----------------------------------|
| 1          | 1 x2                       | 1 x1<br>der(1)t(X;1)x1    | 1 x2                           | 1 x2                              |
| 2          | 2 x2                       | 2 x2                      | 2 x2                           | 2 x2                              |
| 3          | 3 x1<br>der(3)t(2;3)x1     | 3 x2                      | 3 x2                           | 3 x2                              |
| 4          | 4 x2                       | 4 x2                      | 4 x2                           | 4 x2                              |
| 5          | 5 x1<br>der(5)t(5;8)x1     | 5 x2                      | 5 x2                           | 5 x2                              |
| 6          | 6 x2                       | 6 x2                      | 6 x1<br>der(6)t(11;6;22;6)x1   | 6 x2                              |
| 7          | 7 x1<br>der(7)t(7;16)x1    | 7 x2                      | 7 x2                           | 7 x2                              |
| 8          | 8 x1                       | 8 x2                      | 8 x2                           | 8 x2                              |
| 9          | 9 x2                       | 9 x1                      | 9 x2                           | 9 x2                              |
| 10         | 10 x2                      | 10 x2                     | 10 x2                          | 10 x2                             |
| 11         | 11 x1<br>der(11)t(11;12)x1 | 11 x2                     | 11 x1                          | 11 x1<br>der(11)t(11;13;11)<br>x1 |
| 12         | 12 x2                      | 12 x2                     | 12 x1<br>der(12)t(9;6;12;22)x1 | 12 x2                             |
| 13         | 13 x2                      | 13 x2                     | 13 x2                          | 13 x2                             |
| 14         | 14 x2                      | 14 x2                     | 14 x1<br>der(14)t(3;14;11)x1   | 14 x2                             |
| 15         | 15 x2                      | 15 x2                     | 15 x1<br>der(15)t(15;11;14)x1  | 15 x1<br>der(15)t(15;19)x1        |
| 16         | 16 x1<br>der(16)t(5;16)x1  | 16 x2                     | 16 x2                          | 16 x2                             |
| 17         | 17 x1                      | 17 x2                     | 17 x2                          | 17 x2                             |
| 18         | 18 x2                      | 18 x2                     | 18 x2                          | 18 x2                             |
| 19         | 19 x2                      | 19 x2                     | 19 x2                          | 19 x2                             |
| 20         | 20 x1<br>der(20)t(17;20)x1 | 20 x2                     | 20 x1<br>der(20)t(14;20)x1     | 20 x2                             |
| 21         | 21 x2                      | 21 x1<br>der(21)t(X;21)x1 | 21 x2                          | 21 x2                             |
| 22         | 22 x2                      | 22 x1                     | 22 x1                          | 22 x2                             |



|   |      |      |      |      |
|---|------|------|------|------|
| X | X x2 | X x2 | X x2 | X x2 |
|---|------|------|------|------|

| Chromosome | Image 9<br>(n=43)          | Image 10<br>(n=45)      | Image 11<br>(n=44)         | Image 12<br>(n=45)         |
|------------|----------------------------|-------------------------|----------------------------|----------------------------|
| 1          | 1 x1<br>der(1)t(1;20)x1    | 1 x2                    | 1 x2                       | 1 x2                       |
| 2          | 2 x2                       | 2 x2                    | 2 x2                       | 2 x2                       |
| 3          | 3 x2                       | 3 x2                    | 3 x2                       | 3 x2                       |
| 4          | 4 x2                       | 4 x2                    | 4 x2                       | 4 x2                       |
| 5          | 5 x2                       | 5 x2                    | 5 x1                       | 5 x2                       |
| 6          | 6 x2                       | 6 x1<br>der(6)t(6;20)x1 | 6 x2                       | 6 x2                       |
| 7          | 7 x2                       | 7 x2                    | 7 x2                       | 7 x1                       |
| 8          | 8 x2                       | 8 x2                    | 8 x2                       | 8 x2                       |
| 9          | 9 x2                       | 9 x2                    | 9 x2                       | 9 x2                       |
| 10         | 10 x2                      | 10 x2                   | 10 x2                      | 10 x2                      |
| 11         | 11 x2                      | 11 x2                   | 11 x1<br>der(11)t(11;20)x1 | 11 x2                      |
| 12         | 12 x1<br>der(12)t(12;19)x1 | 12 x2                   | 12 x1<br>der(12)t(7;12)x1  | 12 x2                      |
| 13         | 13 x2                      | 13 x2                   | 13 x2                      | 13 x2                      |
| 14         | 14 x1                      | 14 x2                   | 14 x2                      | 14 x1<br>der(14)t(14;20)x1 |
| 15         | 15 x2                      | 15 x2                   | 15 x2                      | 15 x2                      |
| 16         | 16 x2                      | 16 x2                   | 16 x2                      | 16 x2                      |
| 17         | 17 x2                      | 17 x2                   | 17 x2                      | 17 x2                      |
| 18         | 18 x2                      | 18 x1<br>del(18p)x1     | 18 x2                      | 18 x2                      |
| 19         | 19 x1                      | 19 x2                   | 19 x2                      | 19 x2                      |
| 20         | 20 x1                      | 20 x1                   | 20 x1                      | 20 x2                      |
| 21         | 21 x2                      | 21 x2                   | 21 x2                      | 21 x2                      |
| 22         | 22 x2                      | 22 x2                   | 22 x2                      | 22 x2                      |
| X          | X x2                       | X x2                    | X x2                       | X x2                       |

| Chromosome | Image 13<br>(n=44) | Image 14<br>(n=44)        | Image 15<br>(n=43)         | Image 16<br>(n=45)         |
|------------|--------------------|---------------------------|----------------------------|----------------------------|
| 1          | 1 x2               | 1 x2                      | 1 x2                       | 1 x2                       |
| 2          | 2 x2               | 2 x1                      | 2 x2                       | 2 x2                       |
| 3          | 3 x2               | 3 x2<br>der(3)t(3;13)x1   | 3 x2                       | 3 x2                       |
| 4          | 4 x2               | 4 x2                      | 4 x2                       | 4 x2                       |
| 5          | 5 x2               | 5 x2                      | 5 x2                       | 5 x2                       |
| 6          | 6 x2               | 6 x1<br>der(6)t(6;8)x1    | 6 x1<br>der(6)t(6;20)x1    | 6 x2                       |
| 7          | 7 x1               | 7 x2                      | 7 x1<br>del(7q)x1          | 7 x2                       |
| 8          | 8 x2               | 8 x1<br>der(8)t(8;8)x1    | 8 x2                       | 8 x2                       |
| 9          | 9 x2               | 9 x2                      | 9 x2                       | 9 x2                       |
| 10         | 10 x2              | 10 x2                     | 10 x2                      | 10 x2                      |
| 11         | 11 x2              | 11 x2                     | 11 x1<br>der(11)t(11;14)x1 | 11 x2                      |
| 12         | 12 x2              | 12 x2                     | 12 x2                      | 12 x2                      |
| 13         | 13 x2              | 13 x1                     | 13 x2                      | 13 x1<br>der(13)t(13;19)x1 |
| 14         | 14 x2              | 14 x2                     | 14 x1                      | 14 x2                      |
| 15         | 15 x2              | 15 x2                     | 15 x2                      | 15 x2                      |
| 16         | 16 x2              | 16 x2                     | 16 x2                      | 16 x2                      |
| 17         | 17 x2              | 17 x1                     | 17 x2                      | 17 x2                      |
| 18         | 18 x2              | 18 x2                     | 18 x2                      | 18 x2                      |
| 19         | 19 x2              | 19 x1<br>der(19)t(5;19)x1 | 19 x2                      | 19 x1                      |
| 20         | 20 x1              | 20 x2                     | 20 x1                      | 20 x2                      |
| 21         | 21 x2              | 21 x2                     | 21 x2                      | 21 x2                      |
| 22         | 22 x2              | 22 x2                     | 22 x1                      | 22 x2                      |
| X          | X x2               | X x2                      | X x2                       | X x2                       |

| Chromosome | Image 17<br>(n=41)      | Image 18<br>(n=46) | Image 19<br>(n=44)         | Image 20<br>(n=46) |
|------------|-------------------------|--------------------|----------------------------|--------------------|
| 1          | 1 x2                    | 1 x2               | 1 x2                       | 1 x2               |
| 2          | 2 x2                    | 2 x2               | 2 x2                       | 2 x2               |
| 3          | 3 x1                    | 3 x2               | 3 x2                       | 3 x2               |
| 4          | 4 x1                    | 4 x2               | 4 x2                       | 4 x2               |
| 5          | 5 x1                    | 5 x2               | 5 x2                       | 5 x2               |
| 6          | 6 x1<br>der(6)t(6;14)x1 | 6 x2               | 6 x2                       | 6 x2               |
| 7          | 7 x2                    | 7 x2               | 7 x2                       | 7 x2               |
| 8          | 8 x2                    | 8 x2               | 8 x1<br>der(8)t(8;8)x1     | 8 x2               |
| 9          | 9 x1                    | 9 x2               | 9 x1<br>der(9)t(9;18)x1    | 9 x2               |
| 10         | 10 x2                   | 10 x2              | 10 x2                      | 10 x2              |
| 11         | 11 x2                   | 11 x2              | 11 x2                      | 11 x2              |
| 12         | 12 x2                   | 12 x2              | 12 x2                      | 12 x2              |
| 13         | 13 x2                   | 13 x2              | 13 x1<br>der(13)t(13;19)x1 | 13 x2              |
| 14         | 14 x2                   | 14 x2              | 14 x2                      | 14 x2              |
| 15         | 15 x2                   | 15 x2              | 15 x2                      | 15 x2              |
| 16         | 16 x2                   | 16 x2              | 16 x1<br>der(16)t(16;16)x1 | 16 x2              |
| 17         | 17 x2                   | 17 x2              | 17 x2                      | 17 x2              |
| 18         | 18 x1                   | 18 x2              | 18 x1                      | 18 x2              |
| 19         | 19 x2                   | 19 x2              | 19 x1                      | 19 x2              |
| 20         | 20 x2                   | 20 x2              | 20 x2                      | 20 x2              |
| 21         | 21 x2                   | 21 x2              | 21 x1<br>der(21)t(16;21)x1 | 21 x2              |
| 22         | 22 x2                   | 22 x2              | 22 x2                      | 22 x2              |
| X          | X x2                    | X x2               | X x2                       | X x2               |

Day 40

sh-ATG3

| Chromosome | Image 1<br>(n=44)      | Image 2<br>(n=44)          | Image 3<br>(n=43)         | Image 4<br>(n=41)         |
|------------|------------------------|----------------------------|---------------------------|---------------------------|
| 1          | 1 x2                   | 1 x2                       | 1 x2                      | 1 x2                      |
| 2          | 2 x2                   | 2 x1<br>der(2)t(2;12)x1    | 2 x1                      | 2 x2                      |
| 3          | 3 x2                   | 3 x2                       | 3 x2                      | 3 x2                      |
| 4          | 4 x2                   | 4 x2                       | 4 x2                      | 4 x2                      |
| 5          | 5 x2                   | 5 x2                       | 5 x2                      | 5 x2                      |
| 6          | 6 x1<br>der(6)t(1;6)x1 | 6 x2                       | 6 x1                      | 6 x1<br>der(6)t(6;9)x1    |
| 7          | 7 x2                   | 7 x2                       | 7 x2                      | 7 x1<br>der(7)t(7;12)x1   |
| 8          | 8 x2                   | 8 x2                       | 8 x2                      | 8 x2                      |
| 9          | 9 x2                   | 9 x2                       | 9 x2                      | 9 x1                      |
| 10         | 10 x1<br>del(10q)x1    | 10 x2                      | 10 x2                     | 10 x2                     |
| 11         | 11 x2                  | 11 x1<br>der(11)t(11;15)x1 | 11 x2                     | 11 x2                     |
| 12         | 12 x1                  | 12 x1                      | 12 x2                     | 12 x1                     |
| 13         | 13 x2                  | 13 x2                      | 13 x2                     | 13 x2                     |
| 14         | 14 x2                  | 14 x2                      | 14 x1                     | 14 x2                     |
| 15         | 15 x2                  | 15 x1                      | 15 x1<br>der(15)t(2;15)x1 | 15 x2                     |
| 16         | 16 x2                  | 16 x2                      | 16 x2                     | 16 x2                     |
| 17         | 17 x2                  | 17 x2                      | 17 x2                     | 17 x2                     |
| 18         | 18 x1                  | 18 x2                      | 18 x2                     | 18 x2                     |
| 19         | 19 x2                  | 19 x2                      | 19 x2                     | 19 x2<br>der(19)t(8;19)x1 |
| 20         | 20 x2                  | 20 x2                      | 20 x2                     | 20 x2                     |
| 21         | 21 x2                  | 21 x2                      | 21 x2                     | 21 x2                     |
| 22         | 22 x2                  | 22 x2                      | 22 x2                     | 22 x2                     |
| X          | X x2                   | X x2                       | X x2                      | X x2                      |

| Chromosome | Image 5<br>(n=45)       | Image 6<br>(n=46) | Image 7<br>(n=45)          | Image 8<br>(n=43)             |
|------------|-------------------------|-------------------|----------------------------|-------------------------------|
| 1          | 1 x2                    | 1 x2              | 1 x2                       | 1 x2                          |
| 2          | 2 x2                    | 2 x2              | 2 x2                       | 2 x2                          |
| 3          | 3 x2                    | 3 x2              | 3 x2                       | 3 x2                          |
| 4          | 4 x2                    | 4 x2              | 4 x2                       | 4 x2                          |
| 5          | 5 x1<br>der(5)t(5;15)x1 | 5 x2              | 5 x2                       | 5 x1<br>der(5)t(20;9;5)x1     |
| 6          | 6 x2                    | 6 x2              | 6 x2                       | 6 x1<br>der(6)t(6;12;22;13)x1 |
| 7          | 7 x2                    | 7 x2              | 7 x2                       | 7 x2                          |
| 8          | 8 x2                    | 8 x2              | 8 x1<br>der(8)t(8;9)x1     | 8 x2                          |
| 9          | 9 x1<br>del(9q)x1       | 9 x2              | 9 x1                       | 9 x2                          |
| 10         | 10 x2                   | 10 x2             | 10 x2                      | 10 x2                         |
| 11         | 11 x1<br>del(11q)x1     | 11 x2             | 11 x2                      | 11 x2                         |
| 12         | 12 x2                   | 12 x2             | 12 x2                      | 12 x1<br>der(12)t(6;12)x1     |
| 13         | 13 x2                   | 13 x2             | 13 x2                      | 13 x2                         |
| 14         | 14 x2                   | 14 x2             | 14 x2                      | 14 x2                         |
| 15         | 15 x1                   | 15 x2             | 15 x1<br>der(15)t(11;15)x1 | 15 x2                         |
| 16         | 16 x2                   | 16 x2             | 16 x2                      | 16 x1<br>der(16)t(16;5;17)x1  |
| 17         | 17 x2                   | 17 x2             | 17 x2                      | 17 x1                         |
| 18         | 18 x2                   | 18 x2             | 18 x2                      | 18 x2                         |
| 19         | 19 x2                   | 19 x2             | 19 x1<br>der(19)t(9;19)x1  | 19 x2                         |
| 20         | 20 x2                   | 20 x2             | 20 x2                      | 20 x1                         |
| 21         | 21 x2                   | 21 x2             | 21 x2                      | 21 x2                         |
| 22         | 22 x2                   | 22 x2             | 22 x2                      | 22 x1                         |
| X          | X x2                    | X x2              | X x2                       | X x2                          |

| Chromosome | Image 9<br>(n=45) | Image 10<br>(n=45)        | Image 11<br>(n=43)        | Image 12<br>(n=44)         |
|------------|-------------------|---------------------------|---------------------------|----------------------------|
| 1          | 1 x2              | 1 x2                      | 1 x2                      | 1 x2                       |
| 2          | 2 x2              | 2 x2                      | 2 x1<br>der(2)t(2;5;16)x1 | 2 x2                       |
| 3          | 3 x2              | 3 x1                      | 3 x2                      | 3 x2                       |
| 4          | 4 x2              | 4 x2                      | 4 x2                      | 4 x2                       |
| 5          | 5 x2              | 5 x2                      | 5 x1                      | 5 x1<br>der(5)t(5;19)x1    |
| 6          | 6 x2              | 6 x2                      | 6 x2                      | 6 x2                       |
| 7          | 7 x2              | 7 x2                      | 7 x1                      | 7 x2                       |
| 8          | 8 x2              | 8 x2                      | 8 x2                      | 8 x2                       |
| 9          | 9 x2              | 9 x2                      | 9 x2                      | 9 x2                       |
| 10         | 10 x2             | 10 x2                     | 10 x2                     | 10 x2                      |
| 11         | 11 x2             | 11 x2                     | 11 x2                     | 11 x2                      |
| 12         | 12 x2             | 12 x2                     | 12 x2                     | 12 x2                      |
| 13         | 13 x2             | 13 x2                     | 13 x2                     | 13 x2                      |
| 14         | 14 x2             | 14 x2                     | 14 x2                     | 14 x2                      |
| 15         | 15 x2             | 15 x2                     | 15 x2                     | 15 x2                      |
| 16         | 16 x1             | 16 x2                     | 16 x2                     | 16 x1                      |
| 17         | 17 x2             | 17 x2                     | 17 x2                     | 17 x2                      |
| 18         | 18 x2             | 18 x2                     | 18 x1                     | 18 x2                      |
| 19         | 19 x2             | 19 x2                     | 19 x2                     | 19 x1<br>der(19)t(19;22)x1 |
| 20         | 20 x2             | 20 x1<br>der(20)t(3;20)x1 | 20 x2                     | 20 x2                      |
| 21         | 21 x2             | 21 x2                     | 21 x2                     | 21 x2                      |
| 22         | 22 x2             | 22 x2                     | 22 x2                     | 22 x1                      |
| X          | X x2              | X x2                      | X x2                      | X x2                       |

| Chromosome | Image 13<br>(n=43)             | Image 14<br>(n=43)         | Image 15<br>(n=39) | Image 16<br>(n=46)  |
|------------|--------------------------------|----------------------------|--------------------|---------------------|
| 1          | 1 x2                           | 1 x1<br>der(1)t(1;19)x1    | 1 x2               | 1 x2                |
| 2          | 2 x2                           | 2 x2                       | 2 x2               | 2 x2                |
| 3          | 3 x2                           | 3 x2                       | 3 x1               | 3 x2                |
| 4          | 4 x1<br>del(4p)x1<br>del(4q)x1 | 4 x2                       | 4 x2               | 4 x2                |
| 5          | 5 x2                           | 5 x1                       | 5 x1               | 5 x2                |
| 6          | 6 x1<br>der(6)t(7;13;6)x1      | 6 x2                       | 6 x2               | 6 x2                |
| 7          | 7 x1                           | 7 x1<br>der(7)t(7;8)x1     | 7 x1               | 7 x2                |
| 8          | 8 x1<br>der(6)t(18;9;8)x1      | 8 x1                       | 8 x2               | 8 x2                |
| 9          | 9 x1                           | 9 x2                       | 9 x2               | 9 x2                |
| 10         | 10 x2                          | 10 x2                      | 10 x1              | 10 x2               |
| 11         | 11 x2                          | 11 x2                      | 11 x2              | 11 x1<br>del(11q)x1 |
| 12         | 12 x2                          | 12 x2                      | 12 x2              | 12 x2               |
| 13         | 13 x2                          | 13 x1<br>der(13)t(13;17)x1 | 13 x2              | 13 x2               |
| 14         | 14 x2                          | 14 x2                      | 14 x2              | 14 x2               |
| 15         | 15 x2                          | 15 x2                      | 15 x2              | 15 x2               |
| 16         | 16 x2                          | 16 x2                      | 16 x1              | 16 x2               |
| 17         | 17 x2                          | 17 x2                      | 17 x1              | 17 x2               |
| 18         | 18 x1                          | 18 x2                      | 18 x2              | 18 x2               |
| 19         | 19 x2                          | 19 x1                      | 19 x2              | 19 x2               |
| 20         | 20 x2                          | 20 x2                      | 20 x2              | 20 x2               |
| 21         | 21 x1<br>der(21)t(9;21)x1      | 21 x2                      | 21 x2              | 21 x2               |
| 22         | 22 x2                          | 22 x2                      | 22 x1              | 22 x2               |
| X          | X x2                           | X x2                       | X x2               | X x2                |



| Chromosome | Image 17<br>(n=40) | Image 18<br>(n=42)         | Image 19<br>(n=45)        | Image 20<br>(n=44)         |
|------------|--------------------|----------------------------|---------------------------|----------------------------|
| 1          | 1 x2               | 1 x2                       | 1 x2                      | 1 x2                       |
| 2          | 2 x2               | 2 x2                       | 2 x2                      | 2 x2                       |
| 3          | 3 x2               | 3 x2                       | 3 x2                      | 3 x2                       |
| 4          | 4 x2               | 4 x2                       | 4 x2                      | 4 x1<br>der(4)t(20;19;4)x1 |
| 5          | 5 x2               | 5 x2                       | 5 x2                      | 5 x2                       |
| 6          | 6 x2               | 6 x2                       | 6 x2                      | 6 x2                       |
| 7          | 7 x2               | 7 x2                       | 7 x1<br>der(7)t(7;17)x1   | 7 x1<br>der(7)t(19;4;7)x1  |
| 8          | 8 x2               | 8 x2                       | 8 x1<br>der(8)t(8;20)x1   | 8 x2                       |
| 9          | 9 x2               | 9 x2                       | 9 x1<br>t(9;19)x1         | 9 x2                       |
| 10         | 10 x2              | 10 x2                      | 10 x2                     | 10 x2                      |
| 11         | 11 x1              | 11 x2                      | 11 x1<br>der(11)t(9;11)x1 | 11 x2                      |
| 12         | 12 x2              | 12 x1<br>der(12)t(12;22)x1 | 12 x2                     | 12 x2                      |
| 13         | 13 x1              | 13 x2                      | 13 x2                     | 13 x2                      |
| 14         | 14 x2              | 14 x1<br>der(14)t(14;22)x1 | 14 x2                     | 14 x2                      |
| 15         | 15 x2              | 15 x1<br>del(15)x1         | 15 x2                     | 15 x2                      |
| 16         | 16 x2              | 16 x2                      | 16 x2                     | 16 x2                      |
| 17         | 17 x2              | 17 x2                      | 17 x2                     | 17 x2                      |
| 18         | 18 x1              | 18 x2                      | 18 x2                     | 18 x2                      |
| 19         | 19 x2              | -<br>der(19)t(15;19)x1     | 19 x1<br>t(9;19)x1        | 19 x1                      |
| 20         | 20 x1              | 20 x2                      | 20 x1                     | 20 x1                      |
| 21         | 21 x1              | 21 x2                      | 21 x2                     | 21 x2                      |
| 22         | 22 x1              | -                          | 22 x2                     | 22 x2                      |
| X          | X x2               | X x1<br>der(X)t(X;19)x1    | X x2                      | X x2                       |

Day 40

sh-ATG5

| Chromosome | Image 1<br>(n=44)              | Image 2<br>(n=43)           | Image 3<br>(n=45)                 | Image 4<br>(n=72)           |
|------------|--------------------------------|-----------------------------|-----------------------------------|-----------------------------|
| 1          | 1 x2                           | 1 x1<br>der(1)t(1;20)<br>x1 | 1 x2                              | 1 x4                        |
| 2          | 2 x2                           | 2 x2                        | 2 x2                              | 2 x3                        |
| 3          | 3 x2                           | 3 x2                        | 3 x2                              | 3 x4                        |
| 4          | 4 x2                           | 4 x2                        | 4 x2                              | 4 x3                        |
| 5          | 5 x2                           | 5 x2                        | 5 x2                              | 5 x2<br>der(5)t(2;5)<br>x1  |
| 6          | 6 x2                           | 6 x2                        | 6 x2                              | 6 x2<br>der(6)t(6;10)<br>x1 |
| 7          | 7 x2                           | 7 x1<br>der(7)t(7;8)<br>x1  | 7 x2                              | 7 x3<br>der(7)t(6;7)<br>x1  |
| 8          | 8 x2                           | 8 x1                        | 8 x2                              | 8 x3                        |
| 9          | 9 x2                           | 9 x1                        | 9 x2                              | 9 x3                        |
| 10         | 10 x2                          | 10 x2                       | 10 x2                             | 10 x2<br>del(10)x1          |
| 11         | 11 x1<br>der(11)t(11;14)<br>x1 | 11 x2                       | 11 x2                             | 11 x3                       |
| 12         | 12 x1<br>der(12)t(12;20)<br>x1 | 12 x2                       | 12 x2                             | 12 x4                       |
| 13         | 13 x2                          | 13 x2                       | 13 x2                             | 13 x3                       |
| 14         | 14 x1                          | 14 x2                       | 14 x2                             | 14 x2                       |
| 15         | 15 x2                          | 15 x2                       | 15 x1<br>der(15)t(22;19;15)<br>x1 | 15 x1                       |
| 16         | 16 x2                          | 16 x2                       | 16 x2                             | 16 x4                       |
| 17         | 17 x2                          | 17 x2                       | 17 x2                             | 17 x3                       |
| 18         | 18 x2                          | 18 x2                       | 18 x2                             | 18 x2                       |
| 19         | 19 x2                          | 19 x2                       | 19 x2                             | 19 x4                       |

|    |       |       |       |       |
|----|-------|-------|-------|-------|
| 20 | 20 x1 | 20 x1 | 20 x2 | 20 x4 |
| 21 | 21 x2 | 21 x2 | 21 x2 | 21 x2 |
| 22 | 22 x2 | 22 x2 | 22 x1 | 22 x4 |
| X  | X x2  | X x2  | X x2  | X x3  |

| Chromosome | Image 5<br>(n=43) | Image 6<br>(n=44)      | Image 7<br>(n=41) | Image 8<br>(n=81)                               |
|------------|-------------------|------------------------|-------------------|-------------------------------------------------|
| 1          | 1 x2              | 1 x1                   | 1 x2              | 1 x4                                            |
| 2          | 2 x2              | 2 x2                   | 2 x2              | 2 x4                                            |
| 3          | 3 x2              | 3 x2                   | 3 x2              | 3 x4                                            |
| 4          | 4 x2              | 4 x2                   | 4 x2              | 4 x4                                            |
| 5          | 5 x2              | 5 x2                   | 5 x1              | 5 x3                                            |
| 6          | 6 x2              | 6 x2                   | 6 x2              | 6 x4                                            |
| 7          | 7 x2              | 7 x1<br>der(7)t(1;7)x1 | 7 x2              | 7 x4                                            |
| 8          | 8 x2              | 8 x2                   | 8 x2              | 8 x4                                            |
| 9          | 9 x2              | 9 x2                   | 9 x1<br>del(9q)x1 | 9 x2<br>i(9p)x1                                 |
| 10         | 10 x2             | 10 x2                  | 10 x2             | 10 x4                                           |
| 11         | 11 x2             | 11 x2                  | 11 x2             | 11 x4                                           |
| 12         | 12 x2             | 12 x2                  | 12 x2             | 12 x4                                           |
| 13         | 13 x2             | 13 x2                  | 13 x2             | 13 x3                                           |
| 14         | 14 x2             | 14 x2                  | 14 x2             | 14 x3                                           |
| 15         | 15 x2             | 15 x2                  | 15 x1             | 15 x3                                           |
| 16         | 16 x2             | 16 x2                  | 16 x2             | 16 x3                                           |
| 17         | 17 x2             | 17 x2                  | 17 x1             | 17 x2<br>der(17)t(17;20)x1<br>der(17)t(17;21)x1 |
| 18         | 18 x2             | 18 x2                  | 18 x2             | 18 x4                                           |
| 19         | 19 x2             | 19 x2                  | 19 x1             | 19 x3                                           |
| 20         | 20 x1             | 20 x2                  | 20 x2             | 20 x2<br>der(20)t(20;21)x1                      |
| 21         | 21 x1             | 21 x2                  | 21 x1             | 21 x1                                           |
| 22         | 22 x1             | 22 x1                  | 22 x2             | 22 x4                                           |
| X          | X x2              | X x2                   | X x2              | X x4                                            |

| Chromosome | Image 9<br>(n=81)              | Image 10<br>(n=87)                | Image 11<br>(n=43)                                  | Image 12<br>(n=46) |
|------------|--------------------------------|-----------------------------------|-----------------------------------------------------|--------------------|
| 1          | 1 x4                           | 1 x4                              | 1 x1<br>der(1)t(1;17)x1                             | 1 x2               |
| 2          | 2 x4                           | 2 x4                              | 2 x2                                                | 2 x2               |
| 3          | 3 x4                           | 3 x4                              | 3 x2                                                | 3 x2               |
| 4          | 4 x2<br>der(4)t(4;19)x2        | 4 x4                              | 4 x2                                                | 4 x2               |
| 5          | 5 x4                           | 5 x4                              | 5 x2                                                | 5 x2               |
| 6          | 6 x3                           | 6 x4                              | 6 x2                                                | 6 x2               |
| 7          | 7 x4                           | 7 x4                              | 7 x2                                                | 7 x2               |
| 8          | 8 x4                           | 8 x4                              | 8 x2                                                | 8 x2               |
| 9          | 9 x4                           | 9 x4                              | 9 x2                                                | 9 x2               |
| 10         | 10 x3                          | 10 x4                             | 10 x2                                               | 10 x2              |
| 11         | 11 x4                          | 11 x4                             | 11 x2                                               | 11 x2              |
| 12         | 12 x4                          | 12 x3                             | 12 x2                                               | 12 x2              |
| 13         | 13 x2<br>der(13)t(13;13)<br>x1 | 13 x4                             | -<br>der(13)t(11;13)<br>x1<br>der(13)t(13;22)<br>x1 | 13 x2              |
| 14         | 14 x3                          | 14 x4                             | 14 x2                                               | 14 x2              |
| 15         | 15 x4                          | 15 x4                             | 15 x2                                               | 15 x2              |
| 16         | 16 x2<br>del(16q)x1            | 16 x2<br>der(16)t(15;20;21)<br>x2 | 16 x2                                               | 16 x2              |
| 17         | 17 x4                          | 17 x4                             | 17 x1                                               | 17 x2              |
| 18         | 18 x3                          | 18 x4                             | 18 x2                                               | 18 x2              |
| 19         | 19 x2                          | 19 x2<br>der(19)t(19;20)x2        | 19 x2                                               | 19 x2              |
| 20         | 20 x2<br>del(20)x1             | 20 x2                             | 20 x2                                               | 20 x2              |
| 21         | 21 x2                          | 21 x2                             | 21 x1<br>der(21)t(21;22)<br>x1                      | 21 x2              |
| 22         | 22 x2                          | 22 x4                             | -                                                   | 22 x2              |

|   |                       |      |      |      |
|---|-----------------------|------|------|------|
|   | der(22)t(21;22)<br>x1 |      |      |      |
| X | X x4                  | X x4 | X x2 | X x2 |

| Chromosome | Image 13<br>(n=43)      | Image 14<br>(n=46)             | Image 15<br>(n=45) | Image 16<br>(n=46)             |
|------------|-------------------------|--------------------------------|--------------------|--------------------------------|
| 1          | 1 x1<br>der(1)t(1;9)x1  | 1 x2                           | 1 x2               | 1 x2                           |
| 2          | 2 x2                    | 2 x2                           | 2 x1<br>del(2)x1   | 2 x2                           |
| 3          | 3 x2                    | 3 x2                           | 3 x2               | 3 x2                           |
| 4          | 4 x2                    | 4 x2                           | 4 x2               | 4 x2                           |
| 5          | 5 x2                    | 5 x1                           | 5 x2               | 5 x2                           |
| 6          | 6 x1<br>der(6)t(6;19)x1 | 6 x2                           | 6 x2               | 6 x2                           |
| 7          | 7 x2                    | 7 x2                           | 7 x2               | 7 x2                           |
| 8          | 8 x2                    | 8 x2                           | 8 x2               | 8 x2                           |
| 9          | 9 x1                    | 9 x2                           | 9 x2               | 9 x1<br>del(9q)x1              |
| 10         | 10 x2                   | 10 x2                          | 10 x2              | 10 x2                          |
| 11         | 11 x2                   | 11 x2                          | 11 x2              | 11 x2                          |
| 12         | 12 x2                   | 12 x2                          | 12 x2              | 12 x2                          |
| 13         | 13 x2                   | 13 x2                          | 13 x2              | 13 x1<br>der(13)t(13;16)<br>x1 |
| 14         | 14 x2                   | 14 x2                          | 14 x2              | 14 x2                          |
| 15         | 15 x2                   | 15 x2                          | 15 x2              | 15 x2                          |
| 16         | 16 x2                   | 16 x3                          | 16 x2              | 16 x2                          |
| 17         | 17 x2                   | 17 x1<br>del(17p)x1            | 17 x2              | 17 x2                          |
| 18         | 18 x2                   | 18 x2                          | 18 x2              | 18 x2                          |
| 19         | 19 x1                   | 19 x3                          | 19 x2              | 19 x2                          |
| 20         | 20 x2                   | 20 x1<br>der(20)t(20;22)<br>x1 | 20 x2              | 20 x2                          |

|    |       |       |       |       |
|----|-------|-------|-------|-------|
| 21 | 21 x2 | 21 x2 | 21 x2 | 21 x2 |
| 22 | 22 x1 | 22 x2 | 22 x1 | 22 x2 |
| X  | X x2  | X x2  | X x2  | X x2  |

| Chromosome | Image 17<br>(n=44)                  | Image 18<br>(n=84)                                    | Image 19<br>(n=88)                                       | Image 20<br>(n=45)       |
|------------|-------------------------------------|-------------------------------------------------------|----------------------------------------------------------|--------------------------|
| 1          | 1 x2                                | 1 x4                                                  | 1 x4                                                     | 1 x2                     |
| 2          | 2 x2                                | 2 x2<br>der(2)t(2;11)x <sub>1</sub><br>der(2)t(2;2)x1 | 2 x2<br>der(2)t(2;15)x <sub>1</sub><br>der(2)t(2;3;21)x1 | 2 x2                     |
| 3          | 3 x2                                | 3 x3<br>del(3p)x1                                     | 3 x3<br>del(3p)x1                                        | 3 x2                     |
| 4          | 4 x2                                | 4 x4                                                  | 4 x2<br>der(4)t(2;15)x <sub>1</sub><br>der(4)t(2;3;21)x1 | 4 x2                     |
| 5          | 5 x2                                | 5 x4                                                  | 5 x4                                                     | 5 x1<br>der(5)t(5;19)x1  |
| 6          | 6 x2                                | 6 x2<br>i(6q)x1                                       | 6 x4                                                     | 6 x2                     |
| 7          | 7 x2                                | -<br>der(7)t(7;9)x2<br>der(7)t(2;7)x2                 | 7 x4                                                     | 7 x1<br>del(7)x1         |
| 8          | 8 x1<br>der(8)t(8;16)x <sub>1</sub> | 8 x2<br>der(8)t(3;8)x1<br>del(8q)x1                   | 8 x4                                                     | 8 x2                     |
| 9          | 9 x2                                | 9 x2                                                  | 9 x4                                                     | 9 x2                     |
| 10         | 10 x2                               | 10 x4                                                 | 10 x4                                                    | 10 x1<br>der(3)t(5;10)x1 |
| 11         | 11 x2                               | 11 x3                                                 | 11 x4                                                    | 11 x2                    |
| 12         | 12 x2                               | 12 x3<br>der(12)t(X;12)x1                             | 12 x4                                                    | 12 x2                    |
| 13         | 13 x1                               | 13 x4                                                 | 13 x4                                                    | 13 x2                    |

|    |                       |                                |       |       |
|----|-----------------------|--------------------------------|-------|-------|
|    | der(13)t(13;16)<br>x1 |                                |       |       |
| 14 | 14 x2                 | 14 x4                          | 14 x4 | 14 x2 |
| 15 | 15 x2                 | 15 x4                          | 15 x2 | 15 x2 |
| 16 | 16 x1                 | 16 x3<br>del(16p)x1            | 16 x4 | 16 x2 |
| 17 | 17 x2                 | 17 x3                          | 17 x4 | 17 x2 |
| 18 | 18 x2                 | 18 x4                          | 18 x4 | 18 x2 |
| 19 | 19 x2                 | 19 x2<br>der(19)t(19;22)<br>x1 | 19 x4 | 19 x1 |
| 20 | 20 x2                 | 20 x4                          | 20 x4 | 20 x2 |
| 21 | 21 x2                 | 21 x4                          | 21 x2 | 21 x2 |
| 22 | 22 x2                 | 22 x2                          | 22 x4 | 22 x2 |
| X  | X x1                  | X x3<br>der(X)t(X;11)x<br>1    | X x4  | X x2  |

## Day 40

## sh-ATG7

| Chromosome | Image 1<br>(n=87)                        | Image 2<br>(n=45)           | Image 3<br>(n=45) | Image 4<br>(n=44) |
|------------|------------------------------------------|-----------------------------|-------------------|-------------------|
| 1          | 1 x4                                     | 1 x2                        | 1 x2              | 1 x1              |
| 2          | 2 x4                                     | 2 x2                        | 2 x2              | 2 x2              |
| 3          | 3 x4                                     | 3 x2                        | 3 x2              | 3 x2              |
| 4          | 4 x4                                     | 4 x2                        | 4 x2              | 4 x2              |
| 5          | 5 x4                                     | 5 x2                        | 5 x2              | 5 x2              |
| 6          | 6 x4                                     | 6 x2                        | 6 x2              | 6 x2              |
| 7          | 7 x4                                     | 7 x2                        | 7 x2              | 7 x2              |
| 8          | 8 x4                                     | 8 x1<br>der(8)t(8;10)<br>x1 | 8 x2              | 8 x2              |
| 9          | 9 x1<br>del(9q)x1<br>der(9)t(9;19)<br>x2 | 9 x2                        | 9 x2              | 9 x2              |
| 10         | 10 x4                                    | 10 x2                       | 10 x2             | 10 x2             |

|    |                            |                            |                            |                              |
|----|----------------------------|----------------------------|----------------------------|------------------------------|
| 11 | 11 x4                      | 11 x2                      | 11 x2                      | 11 x1                        |
| 12 | 12 x4                      | 12 x2                      | 12 x2                      | 12 x2                        |
| 13 | 13 x2<br>der(13)t(13;14)x2 | 13 x2                      | 13 x1                      | 13 x2                        |
| 14 | 14 x4                      | 14 x2                      | 14 x2                      | 14 x2                        |
| 15 | 15 x4                      | 15 x2                      | 15 x2                      | 15 x2                        |
| 16 | 16 x4                      | 16 x2                      | 16 x2                      | 16 x1<br>der(16)t(16;18)x1   |
| 17 | 17 x2<br>i(17q)x1          | 17 x2                      | 17 x2                      | 17 x2                        |
| 18 | 18 x4                      | 18 x1                      | 18 x2                      | 18 x2                        |
| 19 | -<br>der(19)t(8;19)x2      | 19 x1<br>der(19)t(18;19)x1 | 19 x1<br>der(19)t(11;19)x1 | 19 x2                        |
| 20 | 20 x4                      | 20 x2                      | 20 x1<br>der(20)t(16;20)x1 | 20 x2                        |
| 21 | 21 x4                      | 21 x2                      | 21 x2                      | 21 x2                        |
| 22 | 22 x2                      | 22 x2                      | 22 x2                      | 22 x2                        |
| X  | X x4                       | X x2                       | X x2                       | X x1<br>der(X)t(X;11;X;11)x1 |

| Chromosome | Image 5 (n=43)          | Image 6 (n=43)          | Image 7 (n=47) | Image 8 (n=46) |
|------------|-------------------------|-------------------------|----------------|----------------|
| 1          | 1 x2                    | 1 x2                    | 1 x2           | 1 x2           |
| 2          | 2 x2                    | 2 x2                    | 2 x2           | 2 x2           |
| 3          | 3 x2                    | 3 x2                    | 3 x2           | 3 x2           |
| 4          | 4 x1<br>der(4)t(4;21)x1 | 4 x1                    | 4 x2           | 4 x2           |
| 5          | 5 x2                    | 5 x1<br>der(5)t(5;20)x1 | 5 x2           | 5 x2           |
| 6          | 6 x1<br>der(6)t(6;22)x1 | 6 x2                    | 6 x2           | 6 x2           |



|    |       |       |                       |                                  |
|----|-------|-------|-----------------------|----------------------------------|
| 7  | 7 x3  | 7 x2  | 7 x1<br>del(7q)x<br>1 | 7 x2                             |
| 8  | 8 x2  | 8 x2  | 8 x1<br>del(8p)x<br>1 | 8 x2                             |
| 9  | 9 x2  | 9 x2  | 9 x1<br>del(9)x1      | 9 x2                             |
| 10 | 10 x1 | 10 x2 | 10 x2                 | 10 x2                            |
| 11 | 11 x2 | 11 x2 | 11 x2                 | 11 x1<br>der(11)t(11;3;11)<br>x1 |
| 12 | 12 x2 | 12 x2 | 12 x2                 | 12 x2                            |
| 13 | 13 x2 | 13 x1 | 13 x2                 | 13 x2                            |
| 14 | 14 x2 | 14 x2 | 14 x2                 | 14 x2                            |
| 15 | 15 x1 | 15 x2 | 15 x2                 | 15 x2                            |
| 16 | 16 x2 | 16 x2 | 16 x2                 | 16 x2                            |
| 17 | 17 x2 | 17 x2 | 17 x3                 | 17 x2                            |
| 18 | 18 x2 | 18 x2 | 18 x2                 | 18 x2                            |
| 19 | 19 x2 | 19 x2 | 19 x2                 | 19 x2                            |
| 20 | 20 x2 | 20 x1 | 20 x2                 | 20 x2                            |
| 21 | 21 x1 | 21 x2 | 21 x2                 | 21 x2                            |
| 22 | 22 x1 | 22 x2 | 22 x2                 | 22 x2                            |
| X  | X x2  | X x2  | X x2                  | X x2                             |

| Chromosome | Image 9<br>(n=45) | Image 10<br>(n=46) | Image 11<br>(n=45) | Image 12<br>(n=44)               |
|------------|-------------------|--------------------|--------------------|----------------------------------|
| 1          | 1 x2              | 1 x2               | 1 x2               | 1 x1<br>der(1)t(1;16;15;<br>X)x1 |
| 2          | 2 x2              | 2 x2               | 2 x2               | 2 x2                             |
| 3          | 3 x2              | 3 x2               | 3 x2               | 3 x2                             |
| 4          | 4 x2              | 4 x2               | 4 x2               | 4 x2                             |
| 5          | 5 x2              | 5 x2               | 5 x2               | 5 x2                             |
| 6          | 6 x2              | 6 x2               | 6 x2               | 6 x2                             |
| 7          | 7 x1              | 7 x1               | 7 x2               | 7 x2                             |

|    |                                 |                            |                                 |                                         |
|----|---------------------------------|----------------------------|---------------------------------|-----------------------------------------|
|    | der(7)t(6;7)x1                  | del(7q)x1                  |                                 |                                         |
| 8  | 8 x2                            | 8 x2                       | 8 x2                            | 8 x2                                    |
| 9  | 9 x2                            | 9 x1<br>der(9)t(7;9)<br>x1 | 9 x2                            | 9 x2                                    |
| 10 | 10 x2                           | 10 x2                      | 10 x2                           | 10 x1<br>del(10p)x1<br>der(10)t(2;10)x1 |
| 11 | 11 x1<br>der(11)t(11;1)<br>1)x1 | 11 x2                      | 11 x2                           | 11 x2<br>del(11q)x1                     |
| 12 | 12 x2                           | 12 x2                      | 12 x2                           | 12 x2                                   |
| 13 | 13 x1                           | 13 x2                      | 13 x2                           | 13 x1                                   |
| 14 | 14 x2                           | 14 x2                      | 14 x2                           | 14 x2                                   |
| 15 | 15 x1<br>t(X;15)x1              | 15 x2                      | 15 x2                           | 15 x1                                   |
| 16 | 16 x2                           | 16 x2                      | 16 x2                           | 16 x1<br>del(16q)x1                     |
| 17 | 17 x2                           | 17 x2                      | 17 x2                           | 17 x2                                   |
| 18 | 18 x2                           | 18 x2                      | 18 x2                           | 18 x2                                   |
| 19 | 19 x2                           | 19 x2                      | -                               | 19 x1                                   |
| 20 | 20 x2                           | 20 x2                      | 20 x1<br>der(20)t(19;2)<br>0)x1 | 20 x2                                   |
| 21 | 21 x2                           | 21 x2                      | 21 x3                           | 21 x2                                   |
| 22 | 22 x2                           | 22 x2                      | 22 x2                           | 22 x2                                   |
| X  | X x1<br>t(X;15)x1               | X x2                       | X x2                            | -<br>del(Xq)x1                          |

| Chromosome | Image 13<br>(n=43)        | Image 14<br>(n=45) | Image 15<br>(n=45) | Image 16<br>(n=45)          |
|------------|---------------------------|--------------------|--------------------|-----------------------------|
| 1          | 1 x2                      | 1 x2               | 1 x2               | 1 x1<br>der(1)t(1;12)<br>x1 |
| 2          | 2 x1<br>der(2)t(2;7)<br>1 | 2 x2               | 2 x2               | 2 x2                        |
| 3          | 3 x2                      | 3 x2               | 3 x2               | 3 x1                        |

|    |                               |                                |                                   |                              |
|----|-------------------------------|--------------------------------|-----------------------------------|------------------------------|
|    |                               |                                |                                   | der(3)t(3;12)<br>x1          |
| 4  | 4 x2                          | 4 x2                           | 4 x2                              | 4 x2                         |
| 5  | 5 x2                          | 5 x2                           | 5 x2                              | 5 x1<br>der(5)t(1;3;<br>5)x1 |
| 6  | 6 x2                          | 6 x2                           | 6 x2                              | 6 x2                         |
| 7  | 7 x1                          | 7 x2                           | 7 x2                              | 7 x2                         |
| 8  | 8 x1<br>der(8)t(7;18)<br>x1   | 8 x2                           | 8 x2                              | 8 x2                         |
| 9  | 9 x1<br>del(9q)x1             | 9 x2                           | 9 x2                              | 9 x2                         |
| 10 | 10 x2                         | 10 x2                          | 10 x2                             | 10 x2                        |
| 11 | 11 x2                         | 11 x2                          | 11 x2                             | 11 x2                        |
| 12 | 12 x1<br>der(12)t(7;1<br>2)x1 | 12 x2                          | 12 x2                             | 12 x1                        |
| 13 | 13 x2                         | 13 x1<br>der(13)t(13;2<br>2)x1 | 13 x2                             | 13 x2                        |
| 14 | 14 x2                         | 14 x2                          | 14 x2                             | 14 x2                        |
| 15 | 15 x2                         | 15 x2                          | 15 x2                             | 15 x2                        |
| 16 | 16 x2                         | 16 x2                          | 16 x2                             | 16 x2                        |
| 17 | 17 x1<br>del(17)x1            | 17 x2                          | 17 x2                             | 17 x2                        |
| 18 | 18 x1                         | 18 x2                          | 18 x2                             | 18 x2                        |
| 19 | 19 x1                         | 19 x2                          | 19 x1                             | 19 x2                        |
| 20 | 20 x2                         | 20 x2                          | 20 x1<br>der(20)t(20;20;1<br>9)x1 | 20 x2                        |
| 21 | 21 x2                         | 21 x2                          | 21 x2                             | 21 x2                        |
| 22 | 22 x2                         | 22 x1                          | 22 x2                             | 22 x2                        |
| X  | X x2                          | X x2                           | X x2                              | X x2                         |

| Chromosome | Image 17<br>(n=43) | Image 18<br>(n=45)             | Image 19<br>(n=43)             | Image 20<br>(n=42)                |
|------------|--------------------|--------------------------------|--------------------------------|-----------------------------------|
| 1          | 1 x2               | 1 x2                           | 1 x2                           | 1 x2                              |
| 2          | 2 x2               | 2 x2                           | 2 x2                           | 2 x2                              |
| 3          | 3 x2               | 3 x2                           | 3 x2                           | 3 x2                              |
| 4          | 4 x2               | 4 x2                           | 4 x1<br>der(4)t(16;16;4)<br>x1 | 4 x2                              |
| 5          | 5 x2               | 5 x1<br>der(5)t(5;5)x1         | 5 x1<br>del(5q)x1              | 5 x2                              |
| 6          | 6 x2               | 6 x1<br>del(6)x1<br>del(6)x1   | 6 x2                           | 6 x2                              |
| 7          | 7 x2               | 7 x2                           | 7 x2                           | 7 x1                              |
| 8          | 8 x2               | 8 x2                           | 8 x1<br>der(8)t(8;21)x1        | 8 x2                              |
| 9          | 9 x2               | 9 x1<br>der(9)t(9;20;20)x<br>1 | 9 x2                           | 9 x2                              |
| 10         | 10<br>x2           | 10 x2                          | 10 x2                          | 10 x2                             |
| 11         | 11<br>x2           | -<br>der(11)t(11;17;1<br>1)x1  | 11 x2                          | 11 x2                             |
| 12         | 12<br>x2           | 12 x2                          | 12 x2                          | 12 x2                             |
| 13         | 13<br>x1           | 13 x2                          | 13 x2                          | 13 x1                             |
| 14         | 14<br>x2           | 14 x2                          | 14 x2                          | 14 x2                             |
| 15         | 15<br>x2           | 15 x2                          | 15 x2                          | 15 x2                             |
| 16         | 16<br>x2           | 16 x1<br>der(16)t(16;18)x<br>1 | 16 x1                          | 16 x1<br>der(16)t(16;16;1<br>9)x1 |
| 17         | 17<br>x2           | 17 x1<br>der(17)t(X;17)x1      | 17 x2                          | 17 x2                             |
| 18         | 18<br>x2           | 18 x2                          | 18 x2                          | 18 x2                             |

|    |          |                  |       |       |
|----|----------|------------------|-------|-------|
| 19 | 19<br>x2 | 19 x2            | 19 x2 | 19 x1 |
| 20 | 20<br>x2 | 20 x1            | 20 x2 | 20 x2 |
| 21 | 21<br>x1 | 21 x2            | 21 x1 | 21 x1 |
| 22 | 22<br>x1 | 22 x2            | 22 x1 | 22 x2 |
| X  | X x2     | X x1<br>del(X)x1 | X x2  | X x2  |

**Day 85**

**sh-ATG3**

| Chromosome | Image 1<br>(n=110)                               | Image 2<br>(n=82)                            | Image 3<br>(n=84)                    |
|------------|--------------------------------------------------|----------------------------------------------|--------------------------------------|
| 1          | 1 x5                                             | 1 x3<br>der(1)t(1;7)x1                       | 1 x3<br>der(1)t(1;6)x1               |
| 2          | 2 x4<br>der(2)t(2;2)x2                           | 2 x4                                         | 2 x4                                 |
| 3          | 3 x6<br>der(3)t(3;3)x1                           | 3 x4                                         | 3 x4                                 |
| 4          | 4 x2<br>der(4)t(4;16)x3<br>der(4)t(11;19;16;4)x1 | 4 x3<br>der(4)t(4;20)x1                      | 4 x4                                 |
| 5          | 5 x4                                             | 5 x3<br>der(5)t(5;5)x1                       | 5 x4                                 |
| 6          | 6 x4                                             | 6 x4                                         | 6 x2<br>der(6)t(6;6;14)x1<br>i(6p)x1 |
| 7          | 7 x3                                             | 7 x2<br>der(7)t(7;19)x1<br>der(7)t(7;17)x1   | 7 x2<br>der(7)t(20;17;7;17;7)x2      |
| 8          | 8 x3<br>der(8)t(8;15)x2                          | 8 x4                                         | 8 x2<br>del(8p)x2                    |
| 9          | 9 x3<br>i(9p)x2                                  | 9 x2<br>der(9)t(9;16)x1<br>der(9)t(2;18;9)x1 | 9 x3<br>der(9)t(9;19)x1              |
| 10         | 10 x6                                            | 10 x3                                        | 10 x4                                |

|    |                                             |                                                 |                                                    |
|----|---------------------------------------------|-------------------------------------------------|----------------------------------------------------|
| 11 | 11 x7                                       | 11 x2<br>der(1)t(11;11;19)x1<br>del(11q)x1      | 11 x4                                              |
| 12 | 12 x6                                       | 12 x4                                           | 12 x4                                              |
| 13 | 13 x6                                       | 13 x2<br>del(13)x1                              | 13 x4                                              |
| 14 | 14 x5                                       | 14 x4                                           | 14 x3                                              |
| 15 | 15 x2                                       | 15 x4                                           | 15 x4                                              |
| 16 | 16 x3                                       | 16 x3                                           | 16 x2                                              |
| 17 | 17 x5                                       | 17 x1<br>der(17)t(17;17)x1<br>der(17)t(17;19)x1 | 17 x1<br>der(17)t(16;17;16)x1<br>der(17)t(17;19)x1 |
| 18 | 18 x2                                       | 18 x3                                           | 18 x4                                              |
| 19 | -<br>der(19)t(19;19)x2<br>der(19)t(11;19)x3 | -                                               | 19 x2                                              |
| 20 | 20 x3<br>der(20)t(17;20)x3                  | 20 x3                                           | 20 x2                                              |
| 21 | 21 x2                                       | 21 x4                                           | 21 x2                                              |
| 22 | 22 x3<br>der(22)t(22;22)x2                  | 22 x4                                           | 22 x2                                              |
| X  | X x8                                        | X x4                                            | X x2                                               |

| Chromosome | Image 4<br>(n=83)      | Image 5<br>(n=77)      | Image 6<br>(n=80)       |
|------------|------------------------|------------------------|-------------------------|
| 1          | 1 x4                   | 1 x3<br>der(1)t(1;7)x1 | 1 x4                    |
| 2          | 2 x4                   | 2 x4                   | 2 x4                    |
| 3          | 3 x2<br>der(3)t(3;9)x2 | 3 x4                   | 3 x3                    |
| 4          | 4 x4                   | 4 x4                   | 4 x4                    |
| 5          | 5 x4                   | 5 x4                   | 5 x4                    |
| 6          | 6 x4                   | 6 x4                   | 6 x2<br>der(6)t(6;19)x1 |
| 7          | 7 x2<br>der(7)t(7;7)x2 | 7 x2<br>del(7p)x1      | 7 x1                    |
| 8          | 8 x3<br>der(8)t(8;8)x1 | 8 x3                   | 8 x4                    |

|    |                                                                     |                                                         |       |
|----|---------------------------------------------------------------------|---------------------------------------------------------|-------|
| 9  | 9 x2                                                                | 9 x3                                                    | 9 x3  |
| 10 | 10 x4                                                               | 10 x3                                                   | 10 x4 |
| 11 | 11 x2<br>der(11)t(11;12)x1<br>der(11)t(16;20;13;11)x1               | 11 x2                                                   | 11 x3 |
| 12 | ·<br>der(12)t(12;16)x1<br>der(12)t(22;12;12)x1<br>der(12)t(12;22)x1 | 12 x4                                                   | 12 x4 |
| 13 | 13 x2                                                               | 13 x2                                                   | 13 x3 |
| 14 | 14 x4                                                               | 14 x3<br>der(14)t(14;17)x1                              | 14 x4 |
| 15 | 15 x4                                                               | 15 x4                                                   | 15 x3 |
| 16 | 16 x2                                                               | 16 x4                                                   | 16 x3 |
| 17 | 17 x3<br>der(17)t(17;13;20;X)x1                                     | 17 x1                                                   | 17 x4 |
| 18 | 18 x4                                                               | 18 x4                                                   | 18 x4 |
| 19 | 19 x3<br>der(19)t(12;19)x1                                          | 19 x1<br>der(19)t(19;20)x1<br>der(19)t(20;19;19;20;8)x1 | 19 x2 |
| 20 | 20 x2                                                               | 20 x3                                                   | 20 x3 |
| 21 | 21 x4                                                               | 21 x2                                                   | 21 x4 |
| 22 | 22 x4                                                               | 22 x4                                                   | 22 x4 |
| X  | X x4                                                                | X x4                                                    | X x5  |

| Chromosome | Image 7<br>(n=80)         | Image 8<br>(n=80)       | Image 9<br>(n=81)       |
|------------|---------------------------|-------------------------|-------------------------|
| 1          | 1 x3                      | 1 x2<br>del(1q)x1       | 1 x4                    |
| 2          | 2 x4                      | 2 x5<br>der(2)t(2;17)x1 | 2 x3<br>der(2)t(2;15)x1 |
| 3          | 3 x2<br>der(3)t(3;11;9)x1 | 3 x4<br>del(3)x2        | 3 x2<br>del(3q)x1       |
| 4          | 4 x4                      | 4 x5<br>der(4)t(4;18)x1 | 4 x3                    |
| 5          | 5 x4                      | 5 x5                    | 5 x4                    |
| 6          | 6 x2                      | 6 x2                    | 6 x2                    |

|    |                                 |                            |                                      |
|----|---------------------------------|----------------------------|--------------------------------------|
|    |                                 | der(6)t(3;6)x1             | der(6)t(3;6)x1<br>der(6)t(11;19;6)x1 |
| 7  | 7 x3                            | 7 x2                       | 7 x3                                 |
| 8  | 8 x4                            | 8 x3                       | 8 x4                                 |
| 9  | 9 x3<br>der(9)t(7;9)x1          | 9 x2                       | 9 x3                                 |
| 10 | 10 x4                           | 10 x4                      | 10 x4                                |
| 11 | 11 x3<br>der(11)t(11;17)x1      | 11 x1<br>del(11q)x1        | 11 x4                                |
| 12 | 12 x4                           | 12 x4<br>der(12)t(12;20)x1 | 12 x4                                |
| 13 | 13 x4                           | 13 x3                      | 13 x4                                |
| 14 | 14 x4                           | 14 x4                      | 14 x4                                |
| 15 | 15 x3                           | 15 x5                      | 15 x2                                |
| 16 | 16 x2                           | 16 x2                      | 16 x3                                |
| 17 | 17 x2<br>der(17)t(17;14;11;6)x1 | 17 x2                      | 17 x3                                |
| 18 | 18 x3                           | 18 x4                      | 18 x4                                |
| 19 | 19 x2                           | 19 x3                      | 19 x2                                |
| 20 | 20 x3                           | 20 x2                      | 20 x3                                |
| 21 | 21 x4                           | 21 x3                      | 21 x4                                |
| 22 | 22 x4                           | 22 x3                      | 22 x4                                |
| X  | X x4                            | X x2                       | X x4                                 |

| Chromosome | Image 10<br>(n=73)      | Image 11<br>(n=39)      | Image 12<br>(n=42)     |
|------------|-------------------------|-------------------------|------------------------|
| 1          | 1 x4                    | 1 x2                    | 1 x2                   |
| 2          | 2 x3<br>der(2)t(2;10)x1 | 2 x1                    | 2 x1                   |
| 3          | 3 x1<br>del(3p)x1       | 3 x2                    | 3 x1<br>der(3)t(3;9)x1 |
| 4          | 4 x2                    | 4 x2                    | 4 x2                   |
| 5          | 5 x4                    | 5 x2                    | 5 x2                   |
| 6          | 6 x2<br>der(6)t(6;16)x1 | 6 x1<br>der(6)t(6;9)x1  | 6 x2                   |
| 7          | 7 x1<br>del(7p)x1       | 7 x1<br>der(7)t(7;22)x1 | 7 x2                   |



|    |                                                           |                               |                            |
|----|-----------------------------------------------------------|-------------------------------|----------------------------|
|    | del(7q)x1                                                 |                               |                            |
| 8  | 8 x4                                                      | 8 x2                          | 8 x2                       |
| 9  | 9 x3                                                      | 9 x1                          | 9 x1                       |
| 10 | 10 x2                                                     | 10 x2                         | 10 x2                      |
| 11 | 11 x2                                                     | 11 x2                         | 11 x2                      |
| 12 | 12 x4                                                     | 12 x2                         | 12 x2                      |
| 13 | 13 x3                                                     | -<br>der(13)t(13;14)x1        | 13 x2                      |
| 14 | 14 x3                                                     | 14 x1                         | 14 x2                      |
| 15 | 15 x3                                                     | 15 x2                         | 15 x2                      |
| 16 | 16 x3                                                     | 16 x1                         | 16 x1                      |
| 17 | 17 x4                                                     | 17 x1<br>del(17)x1            | 17 x2                      |
| 18 | 18 x3                                                     | 18 x1<br>der(18)t(16;19;18)x1 | 18 x2                      |
| 19 | 19 x1<br>del(19q)x1                                       | 19 x1                         | 19 x1                      |
| 20 | 20 x2<br>der(20)t(15;19;15;20)x1<br>der(20)t(20;7;20;7)x1 | 20 x2                         | 20 x1<br>der(20)t(X;20)x1  |
| 21 | 21 x4                                                     | 21 x2                         | 21 x1<br>der(21)t(16;21)x1 |
| 22 | 22 x3                                                     | 22 x1                         | 22 x2                      |
| X  | X x4                                                      | X x2                          | X x2                       |

| Chromosome | Image 13<br>(n=38)      | Image 14<br>(n=83)      | Image 15<br>(n=82)           |
|------------|-------------------------|-------------------------|------------------------------|
| 1          | 1 x2                    | 1 x4                    | 1 x4                         |
| 2          | 2 x2                    | 2 x4                    | 2 x4                         |
| 3          | 3 x2                    | 3 x3                    | 3 x2<br>der(3)t(19;6;19;3)x1 |
| 4          | 4 x2                    | 4 x4                    | 4 x4                         |
| 5          | 5 x1<br>der(5)t(5;14)x1 | 5 x4                    | 5 x4                         |
| 6          | 6 x2                    | 6 x2<br>der(6)t(6;20)x1 | 6 x2<br>del(6p)x1            |
| 7          | 7 x1                    | 7 x2                    | 7 x2                         |

|    |                               |                              |                              |
|----|-------------------------------|------------------------------|------------------------------|
|    |                               | der(7)t(7;19)x1<br>del(7p)x1 | der(7)t(7;16)x1              |
| 8  | 8 x2                          | 8 x4                         | 8 x4                         |
| 9  | 9 x2                          | 9 x4                         | 9 x3                         |
| 10 | 10 x1                         | 10 x4                        | 10 x4                        |
| 11 | 11 x1<br>der(11)t(11;11;19)x1 | 11 x3                        | 11 x3                        |
| 12 | 12 x1<br>der(12)t(12;17)x1    | 12 x4                        | 12 x4                        |
| 13 | 13 x1                         | 13 x4                        | 13 x3                        |
| 14 | 14 x2                         | 14 x4                        | 14 x4                        |
| 15 | 15 x2                         | 15 x3                        | 15 x4                        |
| 16 | 16 x1                         | 16 x3                        | 16 x2                        |
| 17 | 17 x1                         | 17 x4                        | 17 x4                        |
| 18 | 18 x1                         | 18 x4                        | 18 x3<br>der(18)t(16;18)x1   |
| 19 | 19 x1                         | 19 x2                        | 19 x2                        |
| 20 | 20 x1                         | 20 x3                        | 20 x3<br>der(20)t(20;19;7)x1 |
| 21 | 21 x2                         | 21 x4                        | 21 x4                        |
| 22 | 22 x2                         | 22 x3                        | 22 x4                        |
| X  | X x2                          | X x4                         | X x4                         |

| Chromosome | Image 16<br>(n=45) | Image 17<br>(n=38)   | Image 18<br>(n=80)     |
|------------|--------------------|----------------------|------------------------|
| 1          | 1 x2               | 1 x3                 | 1 x3<br>der(1)t(1;7)x1 |
| 2          | 2 x1               | 2 x2                 | 2 x4                   |
| 3          | 3 x1               | 3 x2                 | 3 x3                   |
| 4          | 4 x2               | 4 x1                 | 4 x4                   |
| 5          | 5 x4               | 5 x2                 | 5 x3                   |
| 6          | 6 x1               | -<br>der(6)t(6;18)x1 | 6 x4                   |
| 7          | 7 x1               | 7 x1                 | 7 x2                   |
| 8          | 8 x1               | -                    | 8 x3                   |
| 9          | 9 x2               | 9 x1                 | 9 x3                   |

|    |                             |                                 |                                                |
|----|-----------------------------|---------------------------------|------------------------------------------------|
| 10 | 10 x1                       | 10 x1                           | 10 x3                                          |
| 11 | 11 x1<br>del(11q)x1         | 11 x2                           | 11 x2<br>der(11)t(11;19;9)x1                   |
| 12 | 12 x3                       | -                               | 12 x3                                          |
| 13 | 13 x1                       | 13 x3                           | 13 x3                                          |
| 14 | 14 x3                       | 14 x1                           | 14 x4                                          |
| 15 | 15 x3                       | -<br>der(15)t(12;15)x1          | 15 x3                                          |
| 16 | 16 x4                       | 16 x1                           | 16 x4                                          |
| 17 | 17 x1<br>der(17)t(17;1;7)x1 | 17 x2                           | 17 x4                                          |
| 18 | 18 x1                       | 18 x2                           | 18 x4                                          |
| 19 | 19 x1                       | -<br>der(19)t(9;19)x2           | 19 x2<br>der(19)t(5;19)x1                      |
| 20 | 20 x2                       | 20 x4<br>der(20)t(20;19;2;20)x1 | 20 x2<br>der(20)t(9;20)x1<br>der(20)t(12;20)x1 |
| 21 | 21 x2                       | 21 x2                           | 21 x4                                          |
| 22 | 22 x2                       | -                               | 22 x4                                          |
| X  | X x3                        | X x3                            | X x4                                           |

| Chromosome | Image 19<br>(n=42)         | Image 20<br>(n=43)         |
|------------|----------------------------|----------------------------|
| 1          | 1 x2                       | 1 x2                       |
| 2          | 2 x2                       | 2 x2                       |
| 3          | 3 x2                       | 3 x1<br>der(3)t(7;18;3)x1  |
| 4          | 4 x2                       | 4 x2                       |
| 5          | 5 x2                       | 5 x2                       |
| 6          | 6 x2                       | 6 x2                       |
| 7          | 7 x1                       | 7 x1                       |
| 8          | 8 x2                       | 8 x2                       |
| 9          | 9 x2                       | 9 x1<br>del(9q)x1          |
| 10         | 10 x2                      | 10 x2                      |
| 11         | 11 x1                      | 11 x2                      |
| 12         | 12 x1<br>del(12p)x1        | 12 x2                      |
| 13         | -<br>der(13)t(11;13)x1     | 13 x2                      |
| 14         | 14 x2                      | 14 x2                      |
| 15         | 15 x2                      | -<br>der(15)t(15;15)x1     |
| 16         | 16 x2                      | 16 x2                      |
| 17         | 17 x1<br>der(17)t(7;17)x1  | 17 x2                      |
| 18         | 18 x2                      | 18 x1                      |
| 19         | 19 x1<br>der(19)t(19;20)x1 | 19 x2                      |
| 20         | 20 x1                      | 20 x1<br>der(20)t(4;20)x1  |
| 21         | 21 x2                      | 21 x2                      |
| 22         | 22 x2                      | 22 x1<br>der(22)t(22;22)x1 |
| X          | X x2                       | X x2                       |

Day 85

sh-ATG5

| Chromosome | Image 1<br>(n=43)               | Image 2<br>(n=78)          | Image 3<br>(n=80)                              |
|------------|---------------------------------|----------------------------|------------------------------------------------|
| 1          | 1 x2                            | 1 x4                       | 1 x4                                           |
| 2          | 2 x2                            | 2 x4                       | 2 x4                                           |
| 3          | 3 x2                            | 3 x3<br>der(3)t(3;7)x1     | 3 x4                                           |
| 4          | 4 x2                            | 4 x4                       | 4 x4                                           |
| 5          | 5 x2                            | 5 x2<br>der(5)t(5;14)x2    | 5 x2<br>der(5)t(5;17)x2                        |
| 6          | 6 x2                            | 6 x4                       | 6 x4                                           |
| 7          | 7 x1<br>der(7)t(7;7)x1          | 7 x3                       | 7 x2<br>der(7)t(7;19;7)x1<br>der(7)t(7;19;9)x1 |
| 8          | 8 x1<br>der(8)t(8;13)x1         | 8 x4                       | 8 x2<br>der(8)t(8;19;17;19;8)x1                |
| 9          | 9 x2                            | 9 x3                       | 9 x3<br>der(9)t(9;19;9;19;7)x1                 |
| 10         | 10 x2<br>del(10p)x1             | 10 x3<br>der(10)t(10;20)x1 | 10 x4                                          |
| 11         | 11 x1<br>der(11)t(11;15;7;19)x1 | 11 x3                      | 11 x2<br>der(11)t(11;20)x2                     |
| 12         | 12 x2                           | 12 x4                      | 12 x2<br>der(12)t(12;12)x1                     |
| 13         | 13 x1                           | 13 x2<br>der(13)t(13;13)x1 | 13 x3<br>der(13)t(19;18;13)x1                  |
| 14         | 14 x2                           | 14 x2                      | 14 x3<br>der(14)t(17;18;14)x1                  |
| 15         | 15 x2                           | 15 x4                      | 15 x4                                          |
| 16         | 16 x1<br>del(16q)x1             | 16 x4                      | 16 x3                                          |
| 17         | 17 x1<br>del(17q)x1             | 17 x2                      | 17 x3                                          |
| 18         | 18 x2                           | 18 x3                      | 18 x4                                          |

|    |       |                  |       |
|----|-------|------------------|-------|
|    |       | der(18)t(7;18)x1 |       |
| 19 | 19 x1 | 19 x4            | 19 x1 |
| 20 | 20 x2 | 20 x2            | 20 x2 |
| 21 | 21 x2 | 21 x3            | 21 x1 |
| 22 | 22 x1 | 22 x1            | 22 x4 |
| X  | X x2  | X x4             | X x4  |

| Chromosome | Image 4<br>(n=84)                   | Image 5<br>(n=80)                    | Image 6<br>(n=44)                                                             |
|------------|-------------------------------------|--------------------------------------|-------------------------------------------------------------------------------|
| 1          | 1 x4                                | 1 x4                                 | 1 x2                                                                          |
| 2          | 2 x4                                | 2 x2<br>der(2)t(2;19)x1<br>del(2p)x1 | 2 x2                                                                          |
| 3          | 3 x4                                | 3 x4                                 | 3 x1<br>der(3)t(20;11;3)x1                                                    |
| 4          | 4 x2                                | 4 x4                                 | 4 x2                                                                          |
| 5          | 5 x4                                | 5 x4                                 | 5 x2                                                                          |
| 6          | 6 x3<br>del(6p)x1                   | 6 x3<br>der(6)t(X;6)x1               | 6 x2                                                                          |
| 7          | 7 x2<br>del(7q)x1<br>der(7)t(4;7)x1 | 7 x4                                 | 7 x2                                                                          |
| 8          | 8 x3                                | 8 x3                                 | 8 x2                                                                          |
| 9          | 9 x2<br>del(9p)x1<br>del(9q)x1      | 9 x3                                 | 9 x2                                                                          |
| 10         | 10 x4                               | 10 x4                                | 10 x2                                                                         |
| 11         | 11 x4                               | 11 x4                                | 11 x1<br>der(11)t(11;11)x1<br>der(11)t(11;13;11;13)x1<br>der(11)t(11;14;11)x1 |
| 12         | 12 x3<br>der(12)t(20;17;12)x1       | 12 x3<br>der(12)t(12;19)x1           | 12 x2                                                                         |
| 13         | 13 x3                               | 13 x2<br>der(13)t(13;19)x1           | 13 x1                                                                         |
| 14         | 14 x3<br>del(14)x1                  | 14 x4                                | 14 x1                                                                         |
| 15         | 15 x3                               | 15 x2                                | 15 x2                                                                         |

|    |                               |                  |                                             |
|----|-------------------------------|------------------|---------------------------------------------|
|    |                               | der(15)t(8;15)x1 |                                             |
| 16 | 16 x3                         | 16 x2            | -<br>der(16)t(16;16)x1<br>der(16)t(16;21)x1 |
| 17 | 17 x4                         | 17 x3            | 17 x2                                       |
| 18 | 18 x3<br>i(18p)x1             | 18 x4            | 18 x2                                       |
| 19 | 19 x3<br>der(19)t(19;20;19)x1 | 19 x1            | 19 x2                                       |
| 20 | 20 x2                         | 20 x4            | 20 x1                                       |
| 21 | 21 x4                         | 21 x4            | 21 x1                                       |
| 22 | 22 x4                         | 22 x3            | -<br>der(22)t(11;22)x1<br>der(22)t(11;22)x1 |
| X  | X x4                          | X x3             | X x2                                        |

| Chromosome | Image 7<br>(n=83)                                            | Image 8<br>(n=43) | Image 9<br>(n=43)          |
|------------|--------------------------------------------------------------|-------------------|----------------------------|
| 1          | 1 x4                                                         | 1 x2              | 1 x2                       |
| 2          | 2 x4                                                         | 2 x2              | 2 x1<br>der(2)t(2;20;22)x1 |
| 3          | 3 x3<br>del(3p)x1<br>del(3q)x1                               | 3 x2              | 3 x2                       |
| 4          | 4 x4                                                         | 4 x2              | 4 x2                       |
| 5          | 5 x2<br>der(5)t(5;16)x1<br>der(5)t(5;8)x1                    | 5 x2              | 5 x1<br>der(5)t(X;5)x1     |
| 6          | 6 x3<br>del(6p)x1                                            | 6 x2              | 6 x2                       |
| 7          | -<br>der(7)t(7;15)x1<br>der(7)t(7;21)x1<br>der(7)t(7;19;7)x1 | 7 x1              | 7 x2                       |
| 8          | 8 x3                                                         | 8 x2              | 8 x1                       |
| 9          | 9 x4                                                         | 9 x1<br>del(9q)x1 | 9 x2                       |
| 10         | 10 x4                                                        | 10 x2             | 10 x2                      |

|    |                                                                                  |                                             |                            |
|----|----------------------------------------------------------------------------------|---------------------------------------------|----------------------------|
| 11 | 11 x4                                                                            | 11 x1                                       | 11 x2                      |
| 12 | 12 x3                                                                            | 12 x2                                       | 12 x2                      |
| 13 | 13 x3                                                                            | -<br>der(13)t(13;13)x1                      | 13 x2                      |
| 14 | 14 x2<br>der(14)t(13;14)x1<br>der(14)t(14;7;20)x1<br>der(14)t(14;7;13;7;14;12)x1 | 14 x2                                       | 14 x2                      |
| 15 | 15 x2<br>der(15)t(15;17)x1<br>der(15)t(15;21)x1                                  | 15 x3                                       | 15 x2                      |
| 16 | 16 x2                                                                            | -<br>der(16)t(16;16)x1<br>der(16)t(11;16)x1 | 16 x1                      |
| 17 | 17 x3                                                                            | 17 x2                                       | 17 x2                      |
| 18 | 18 x5                                                                            | 18 x2                                       | 18 x2                      |
| 19 | 19 x3<br>der(19)t(14;19;17)x1                                                    | 19 x1<br>der(19)t(19;20)x1                  | 19 x2                      |
| 20 | 20 x3                                                                            | 20 x1<br>der(20)t(20;20)x1                  | 20 x1<br>der(20)t(18;20)x1 |
| 21 | 21 x1                                                                            | 21 x2                                       | 21 x2                      |
| 22 | 22 x4                                                                            | 22 x2                                       | 22 x1                      |
| X  | X x4                                                                             | X x1                                        | X x2                       |

| Chromosome | Image 10<br>(n=83)     | Image 11<br>(n=42) | Image 12<br>(n=69)                        |
|------------|------------------------|--------------------|-------------------------------------------|
| 1          | 1 x4                   | 1 x2               | 1 x3<br>del(1q)x1                         |
| 2          | 2 x4                   | 2 x2               | 2 x1<br>der(2)t(2;5)x1<br>der(2)t(2;15)x1 |
| 3          | 3 x4                   | 3 x2               | 3 x3                                      |
| 4          | 4 x4                   | 4 x2               | 4 x4                                      |
| 5          | 5 x4                   | 5 x2               | 5 x2<br>der(5)t(2;5)x1<br>der(5)t(5;11)x1 |
| 6          | 6 x2<br>der(6)t(6;6)x1 | 6 x2               | 6 x1<br>der(6)t(6;10)x1                   |



|    |                            |                                |                                                 |
|----|----------------------------|--------------------------------|-------------------------------------------------|
| 7  | 7 <b>x4</b>                | 7 <b>x1</b>                    | 7 x2<br>der(7)t(7;17)x1                         |
| 8  | 8 <b>x4</b>                | 8 x2                           | 8 <b>x4</b>                                     |
| 9  | 9 x2<br>der(9)t(9;14)x2    | 9 <b>x1</b><br>der(9)t(9;19)x1 | 9 <b>x1</b>                                     |
| 10 | 10 <b>x4</b>               | 10 x2                          | 10 x2                                           |
| 11 | 11 <b>x3</b><br>del(11q)x1 | 11 x2                          | 11 x2<br>der(11)t(11;20;9;16)x1                 |
| 12 | 12 <b>x4</b>               | 12 x2                          | 12 <b>x3</b>                                    |
| 13 | 13 x2<br>der(13)t(13;19)x1 | 13 <b>x1</b>                   | 13 <b>x3</b>                                    |
| 14 | 14 x2<br>der(14)t(14;14)x1 | 14 x2                          | 14 x2<br>der(14)t(14;17)x1<br>der(14)t(10;14)x1 |
| 15 | 15 <b>x4</b>               | 15 x1<br>der(15)t(15;19)x1     | 15 x2<br>der(15)t(2;5;12;7;15)x1                |
| 16 | 16 <b>x3</b><br>del(16p)x1 | 16 <b>x1</b>                   | 16 <b>x3</b><br>der(16)t(16;9;7)x1              |
| 17 | 17 x2                      | 17 x1<br>der(17)t(17;17)x1     | 17 <b>x1</b>                                    |
| 18 | 18 <b>x1</b>               | 18 x2                          | 18 <b>x3</b>                                    |
| 19 | 19 x2<br>der(19)t(19;19)x1 | 19 <b>x1</b>                   | 19 x2<br>der(19)t(17;19)x1                      |
| 20 | 20 <b>x1</b>               | 20 x2                          | 20 <b>x3</b>                                    |
| 21 | 21 x2                      | 21 x2                          | 21 x2                                           |
| 22 | 22 <b>x4</b>               | 22 x2                          | 22 <b>x4</b>                                    |
| X  | X <b>x4</b>                | X x2                           | X <b>x3</b>                                     |

| Chromosome | Image 13<br>(n=71)                           | Image 14<br>(n=73)                                     | Image 15<br>(n=41) |
|------------|----------------------------------------------|--------------------------------------------------------|--------------------|
| 1          | 1 <b>x4</b>                                  | 1 <b>x4</b>                                            | 1 x2               |
| 2          | 2 x2<br>der(2)t(5;12;2)x1<br>der(2)t(2;19)x1 | 2 x2<br>der(2)t(2;12;19;21;16)x1<br>der(2)t(2;19;12)x1 | 2 x2               |
| 3          | 3 <b>x3</b>                                  | 3 x2<br>del(3q)x1                                      | 3 x2               |
| 4          | 4 <b>x4</b>                                  | 4 <b>x3</b>                                            | 4 x2               |

|    |                                                    |                           |                                             |
|----|----------------------------------------------------|---------------------------|---------------------------------------------|
| 5  | 5 x3                                               | 5 x4                      | 5 x2                                        |
| 6  | 6 x2<br>der(6)t(5;6)x1                             | 6 x4                      | 6 x2                                        |
| 7  | 7 x2<br>der(7)t(7;7;16)x2                          | 7 x2<br>der(7)t(7;21)x1   | 7 x1<br>der(7)t(7;17)x1                     |
| 8  | 8 x2<br>der(8)t(17;18;8)x2                         | 8 x3                      | 8 x2                                        |
| 9  | 9 x4                                               | 9 x2                      | 9 x2                                        |
| 10 | 10 x4                                              | 10 x3                     | 10 x1                                       |
| 11 | 11 x4                                              | 11 x4                     | 11 x2                                       |
| 12 | 12 x2                                              | 12 x3                     | 12 x1<br>der(12)t(10;20;12)x1               |
| 13 | 13 x2                                              | 13 x3                     | 13 x1<br>der(13)t(13;22)x1                  |
| 14 | 14 x4                                              | 14 x3                     | 14 x2                                       |
| 15 | 15 x3                                              | 15 x2                     | 15 x1                                       |
| 16 | 16 x2                                              | 16 x3                     | 16 x2                                       |
| 17 | 17 x1<br>der(17)t(17;22)x1                         | 17 x4                     | 17 x1                                       |
| 18 | 18 x2                                              | 18 x4                     | 18 x2                                       |
| 19 | 19 x2                                              | -<br>der(19)t(15;19)x1    | 19 x1<br>der(19)t(19;21)x1                  |
| 20 | 20 x2<br>der(20)t(20;22;17)x1<br>der(20)t(20;17)x1 | 20 x3                     | -<br>der(20)t(10;20)x1<br>der(20)t(15;20)x1 |
| 21 | 21 x3                                              | 21 x2<br>der(21)t(X;21)x1 | 21 x1                                       |
| 22 | -                                                  | 22 x4                     | 22 x1                                       |
| X  | X x2<br>del(X)x2                                   | X x3                      | X x2                                        |

| Chromosome | Image 16<br>(n=52) | Image 17<br>(n=77) | Image 18<br>(n=54) |
|------------|--------------------|--------------------|--------------------|
| 1          | 1 x2               | 1 x3               | 1 x3               |
| 2          | 2 x1               | 2 x3               | 2 x3               |
| 3          | 3 x3               | 3 x4               | 3 x3               |
| 4          | 4 x3               | 4 x3               | 4 x2               |

|    |                                          |                            |                                                 |
|----|------------------------------------------|----------------------------|-------------------------------------------------|
|    | der(4)t(4;17)x1                          |                            |                                                 |
| 5  | 5 x3<br>der(5)t(5;11)x1                  | 5 x4                       | 5 x1                                            |
| 6  | 6 x1                                     | 6 x2                       | 6 x1<br>der(6)t(6;16)x1                         |
| 7  | 7 x1                                     | 7 x2                       | 7 x2                                            |
| 8  | 8 x2                                     | 8 x2                       | 8 x2                                            |
| 9  | 9 x1<br>der(9)t(2;9)x1<br>der(9)t(5;9)x1 | 9 x4                       | 9 x2                                            |
| 10 | 10 x1                                    | 10 x4                      | 10 x4                                           |
| 11 | 11 x3                                    | 11 x3<br>der(11)t(X;11)x1  | 11 x3<br>der(11)t(11;11;19)x1                   |
| 12 | 12 x2                                    | 12 x4                      | 12 x2                                           |
| 13 | 13 x2                                    | 13 x2                      | 13 x2                                           |
| 14 | 14 x1<br>der(14)t(10;14)x1               | 14 x4                      | 14 x3                                           |
| 15 | 15 x2<br>der(15)t(2;15)x1                | 15 x4                      | 15 x1                                           |
| 16 | 16 x1                                    | 16 x2                      | 16 x1                                           |
| 17 | 17 x2<br>der(17)t(2;17)x1                | 17 x4                      | 17 x2                                           |
| 18 | 18 x2                                    | 18 x2                      | 18 x2                                           |
| 19 | 19 x4                                    | 19 x2<br>der(19)t(19;20)x1 | 19 x1                                           |
| 20 | 20 x1                                    | 20 x2                      | 20 x2<br>der(20)t(15;20)x1<br>der(20)t(17;20)x1 |
| 21 | 21 x2                                    | 21 x1                      | 21 x2                                           |
| 22 | 22 x3                                    | 22 x1                      | 22 x2                                           |
| X  | X x2                                     | X x4                       | X x4                                            |

| Chromosome | Image 19<br>(n=43) | Image 20<br>(n=81) |
|------------|--------------------|--------------------|
| 1          | 1 x2               | 1 x4               |
| 2          | 2 x2               | 2 x4               |
| 3          | 3 x2               | 3 x4               |

|    |                            |                                          |
|----|----------------------------|------------------------------------------|
| 4  | 4 x2                       | 4 x4                                     |
| 5  | 5 x2                       | 5 x4                                     |
| 6  | 6 x2                       | 6 x4                                     |
| 7  | 7 x2                       | 7 x4                                     |
| 8  | 8 x2                       | 8 x4                                     |
| 9  | 9 x1<br>der(9)t(9;14)x1    | 9 x3<br>der(9)t(9;11;20)x1               |
| 10 | 10 x1                      | 10 x3                                    |
| 11 | 11 x2                      | 11 x2                                    |
| 12 | 12 x1<br>der(12)t(12;17)x1 | 12 x4                                    |
| 13 | 13 x2                      | 13 x3                                    |
| 14 | 14 x2                      | 14 x4                                    |
| 15 | 15 x2                      | 15 x3                                    |
| 16 | 16 x2                      | 16 x4                                    |
| 17 | 17 x2                      | 17 x2                                    |
| 18 | 18 x2                      | 18 x4                                    |
| 19 | 19 x2                      | 19 x2<br>der(19)t(19;19)x1<br>del(19q)x1 |
| 20 | 20 x2                      | 20 x3                                    |
| 21 | 21 x2                      | 21 x3                                    |
| 22 | 22 x2                      | 22 x2                                    |
| X  | X x2                       | X x4                                     |

Day 85

sh-ATG7

| Chromosome | Image 1<br>(n=80)                 | Image 2<br>(n=42)            | Image 3<br>(n=84)              |
|------------|-----------------------------------|------------------------------|--------------------------------|
| 1          | 1 x2<br>der(1)t(1;11)x2           | 1 x1<br>-<br>der(1)t(1;12)x1 | 1 x2<br>-<br>der(1)t(1;12)x2   |
| 2          | 2 x4                              | 2 x1<br>der(2)t(2;15)x1      | 2 x3<br>del(2p)x1<br>del(2q)x1 |
| 3          | 3 x4                              | 3 x2                         | 3 x3                           |
| 4          | 4 x4                              | 4 x2                         | 4 x4                           |
| 5          | 5 x4                              | 5 x2                         | 5 x4                           |
| 6          | 6 x4                              | 6 x2                         | 6 x4                           |
| 7          | 7 x2                              | 7 x1<br>der(7)t(20;11;7)x1   | 7 x2                           |
| 8          | 8 x4                              | 8 x2                         | 8 x4                           |
| 9          | 9 x4                              | 9 x2                         | 9 x3                           |
| 10         | 10 x4                             | 10 x2                        | 10 x4                          |
| 11         | -                                 | -<br>del(11p)x1              | 11 x1                          |
| 12         | 12 x3<br>del(12p)x1<br>del(12q)x1 | 12 x1<br>der(11)t(11;12)x1   | 12 x2<br>der(11)t(11;12)x2     |
| 13         | 13 x2                             | 13 x1                        | 13 x2                          |
| 14         | 14 x4                             | 14 x1<br>der(14)t(13;14)x1   | 14 x3<br>der(14)t(13;14)x1     |
| 15         | 15 x4                             | 15 x1                        | 15 x4                          |
| 16         | 16 x4                             | 16 x2                        | 16 x4                          |
| 17         | 17 x4                             | 17 x2                        | 17 x4                          |
| 18         | 18 x4                             | 18 x2                        | 18 x4                          |
| 19         | 19 x2<br>der(19)t(19;11;1)x2      | 19 x1<br>der(19)t(19;11;1)x1 | 19 x2<br>der(19)t(19;11;1)x2   |
| 20         | 20 x2                             | 20 x1                        | 20 x2<br>der(20)t(6;20)x2      |

|    |                            |       |                            |
|----|----------------------------|-------|----------------------------|
| 21 | 21 x2<br>der(21)t(21;21)x1 | 21 x2 | 21 x4                      |
| 22 | 22 x4                      | 22 x2 | 22 x3<br>der(22)t(11;22)x1 |
| X  | X x2                       | X x2  | X x4                       |

| Chromosome | Image 4<br>(n=42)            | Image 5<br>(n=42)            | Image 6<br>(n=43)            |
|------------|------------------------------|------------------------------|------------------------------|
| 1          | 1 x1<br>der(1)t(1;11)x1      | 1 x1<br>der(1)t(1;11)x1      | 1 x1<br>der(1)t(1;11)x1      |
| 2          | 2 x2                         | 2 x2                         | 2 x2                         |
| 3          | 3 x2                         | 3 x2                         | 3 x2                         |
| 4          | 4 x2                         | 4 x2                         | 4 x2                         |
| 5          | 5 x2                         | 5 x2                         | 5 x2                         |
| 6          | 6 x2                         | 6 x2                         | 6 x2                         |
| 7          | 7 x1                         | 7 x1<br>del(7p)x1            | 7 x1<br>der(7)t(7;22)x1      |
| 8          | 8 x2                         | 8 x2                         | 8 x2                         |
| 9          | 9 x2                         | 9 x2                         | 9 x2                         |
| 10         | 10 x2                        | 10 x2                        | 10 x2                        |
| 11         | 11 x1                        | 11 x1                        | -<br>del(11q)x1              |
| 12         | 12 x2                        | 12 x2                        | 12 x2                        |
| 13         | 13 x1                        | 13 x1                        | 13 x1                        |
| 14         | 14 x1<br>der(14)t(13;14)x1   | 14 x1<br>der(14)t(13;14)x1   | 14 x1<br>der(14)t(13;14)x1   |
| 15         | 15 x2                        | 15 x2                        | 15 x2                        |
| 16         | 16 x2                        | 16 x2                        | 16 x2                        |
| 17         | 17 x2                        | 17 x2                        | 17 x2                        |
| 18         | 18 x2                        | 18 x2                        | 18 x2                        |
| 19         | 19 x1<br>der(19)t(19;11;1)x1 | 19 x1<br>der(19)t(19;11;1)x1 | 19 x1<br>der(19)t(19;11;1)x1 |
| 20         | 20 x2                        | 20 x1                        | 20 x2                        |
| 21         | 21 x2                        | 21 x2                        | 21 x2                        |
| 22         | 22 x1                        | 22 x1                        | 22 x1                        |
| X          | X x2                         | X x2                         | X x2                         |

| Chromosome | Image 7<br>(n=43)            | Image 8<br>(n=43)            | Image 9<br>(n=85)            |
|------------|------------------------------|------------------------------|------------------------------|
| 1          | 1 x1<br>der(1)t(1;11)x1      | 1 x1<br>-<br>der(1)t(1;12)x1 | 1 x2<br>der(1)t(1;11)x2      |
| 2          | 2 x2                         | 2 x2                         | 2 x4                         |
| 3          | 3 x2                         | 3 x2                         | 3 x4                         |
| 4          | 4 x2                         | 4 x2                         | 4 x3                         |
| 5          | 5 x2                         | 5 x2                         | 5 x4                         |
| 6          | 6 x2                         | 6 x2                         | 6 x4                         |
| 7          | 7 x1<br>del(7p)x1            | 7 x1                         | 7 x4                         |
| 8          | 8 x2                         | 8 x2                         | 8 x4                         |
| 9          | 9 x2                         | 9 x2                         | 9 x4                         |
| 10         | 10 x2                        | 10 x2                        | 10 x2                        |
| 11         | 11 x1                        | 11 x1                        | 11 x2                        |
| 12         | 12 x2                        | 12 x1<br>der(11)t(11;12)x1   | 12 x4                        |
| 13         | 13 x1                        | 13 x1                        | 13 x2                        |
| 14         | 14 x1<br>der(14)t(13;14)x1   | 14 x1<br>der(14)t(13;14)x1   | 14 x2<br>der(14)t(13;14)x2   |
| 15         | 15 x2                        | 15 x2                        | 15 x4                        |
| 16         | 16 x2                        | 16 x2                        | 16 x4                        |
| 17         | 17 x2                        | 17 x2                        | 17 x4                        |
| 18         | 18 x2                        | 18 x2                        | 18 x4                        |
| 19         | 19 x1<br>der(19)t(19;11;1)x1 | 19 x1<br>der(19)t(19;11;1)x1 | 19 x2<br>der(19)t(19;11;1)x2 |
| 20         | 20 x1                        | 20 x1<br>del(20)x1           | 20 x4                        |
| 21         | 21 x2                        | 21 x2                        | 21 x4                        |
| 22         | 22 x2                        | 22 x2                        | 22 x2                        |
| X          | X x2                         | X x2                         | X x4                         |

| Chromosome | Image 10<br>(n=42) | Image 11<br>(n=74) | Image 12<br>(n=43) |
|------------|--------------------|--------------------|--------------------|
| 1          | 1 x1               | 1 x1               | 1 x1               |

|    |                              |                              |                              |
|----|------------------------------|------------------------------|------------------------------|
|    | der(1)t(1;11)x1              | der(1)t(1;11)x2              | der(1)t(1;11)x1              |
| 2  | 2 x2                         | 2 x4                         | 2 x2                         |
| 3  | 3 x2                         | 3 x3                         | 3 x2                         |
| 4  | 4 x2                         | 4 x3                         | 4 x2                         |
| 5  | 5 x2                         | 5 x4                         | 5 x2                         |
| 6  | 6 x2                         | 6 x3                         | 6 x2                         |
| 7  | 7 x1<br>der(7)t(7;20)x1      | 7 x1<br>del(7p)x2            | 7 x1<br>der(7)t(6;7)x1       |
| 8  | 8 x1                         | 8 x3                         | 8 x2                         |
| 9  | 9 x2                         | 9 x4                         | 9 x2                         |
| 10 | 10 x2                        | 10 x3                        | 10 x2                        |
| 11 | 11 x1                        | 11 x2                        | 11 x1                        |
| 12 | 12 x2                        | 12 x3                        | 12 x1<br>der(12)t(12;22)x1   |
| 13 | 13 x1                        | 13 x3                        | 13 x1<br>der(13)t(13;14)x1   |
| 14 | 14 x1<br>der(14)t(13;14)x1   | 14 x2<br>der(14)t(13;14)x2   | -<br>der(14)t(13;14)x1       |
| 15 | 15 x2                        | 15 x4                        | 15 x2                        |
| 16 | 16 x2                        | 16 x3                        | 16 x2                        |
| 17 | 17 x2                        | 17 x4                        | 17 x1<br>der(17)t(12;17)x1   |
| 18 | 18 x2                        | 18 x4                        | 18 x2                        |
| 19 | 19 x1<br>der(19)t(19;11;1)x1 | 19 x2<br>der(19)t(19;11;1)x1 | 19 x1<br>der(19)t(19;11;1)x1 |
| 20 | 20 x1                        | 20 x2                        | 20 x2                        |
| 21 | 21 x2                        | 21 x3                        | 21 x2                        |
| 22 | 22 x1<br>der(22)t(8;22)x1    | 22 x2                        | 22 x1                        |
| X  | X x2                         | X x4                         | X x2                         |

| Chromosome | Image 13<br>(n=44)                         | Image 14<br>(n=42)      | Image 15<br>(n=43)      |
|------------|--------------------------------------------|-------------------------|-------------------------|
| 1          | 1 x1<br>der(1)t(1;11)x1<br>der(1)t(1;11)x1 | 1 x1<br>der(1)t(1;11)x1 | 1 x1<br>der(1)t(1;11)x1 |
| 2          | 2 x2                                       | 2 x2                    | 2 x2                    |



|    |                              |                              |                              |
|----|------------------------------|------------------------------|------------------------------|
| 3  | 3 x2                         | 3 x2                         | 3 x2                         |
| 4  | 4 x2                         | 4 x2                         | 4 x1<br>del(4)x1             |
| 5  | 5 x2                         | 5 x2                         | 5 x2                         |
| 6  | 6 x2                         | 6 x2                         | 6 x2                         |
| 7  | 7 x1                         | 7 x1<br>der(7)t(7;20)x1      | 7 x1                         |
| 8  | 8 x2                         | 8 x2                         | 8 x2                         |
| 9  | 9 x2                         | 9 x2                         | 9 x2                         |
| 10 | 10 x2                        | 10 x2                        | 10 x2                        |
| 11 | 11 x1                        | 11 x1                        | 11 x1                        |
| 12 | 12 x2                        | 12 x2                        | 12 x2                        |
| 13 | 13 x2                        | 13 x2                        | 13 x1                        |
| 14 | 14 x1<br>der(14)t(13;14)x1   | -<br>der(14)t(14;14;13)x1    | 14 x1<br>der(14)t(13;14)x1   |
| 15 | 15 x2                        | 15 x2                        | 15 x2                        |
| 16 | 16 x2                        | 16 x2                        | 16 x2                        |
| 17 | 17 x2                        | 17 x2                        | 17 x2                        |
| 18 | 18 x2<br>del(18q)x1          | 18 x2                        | 18 x2                        |
| 19 | 19 x1<br>der(19)t(19;11;1)x1 | 19 x1<br>der(19)t(19;11;1)x1 | 19 x1<br>der(19)t(19;11;1)x1 |
| 20 | 20 x2                        | 20 x1                        | 20 x2                        |
| 21 | 21 x2                        | 21 x2                        | 21 x2                        |
| 22 | 22 x1                        | 22 x1                        | 22 x2                        |
| X  | X x2                         | X x2                         | X x2                         |

| Chromosome | Image 16<br>(n=43)      | Image 17<br>(n=42)      | Image 18<br>(n=42)      |
|------------|-------------------------|-------------------------|-------------------------|
| 1          | 1 x1<br>der(1)t(1;11)x1 | 1 x1<br>der(1)t(1;11)x1 | 1 x1<br>der(1)t(1;11)x1 |
| 2          | 2 x2                    | 2 x2                    | 2 x2                    |
| 3          | 3 x2                    | 3 x2                    | 3 x1<br>der(3)t(3;20)x1 |
| 4          | 4 x2                    | 4 x2                    | 4 x2                    |
| 5          | 5 x2                    | 5 x2                    | 5 x2                    |

|    |                              |                              |                              |
|----|------------------------------|------------------------------|------------------------------|
| 6  | 6 x2                         | 6 x2                         | 6 x1<br>t(6;8)x1             |
| 7  | 7 x2                         | 7 x1                         | 7 x1<br>der(7)t(7;20)x1      |
| 8  | 8 x2                         | 8 x1                         | 8 x1<br>t(6;8)x1             |
| 9  | 9 x2                         | 9 x1<br>der(9)t(9;17)x1      | 9 x2                         |
| 10 | 10 x2                        | 10 x2                        | 10 x2                        |
| 11 | 11 x1                        | 11 x1                        | 11 x1                        |
| 12 | 12 x2                        | 12 x2                        | 12 x2                        |
| 13 | 13 x1<br>der(13)t(13;13)x1   | 13 x1                        | 13 x1                        |
| 14 | 14 x1<br>der(14)t(13;14)x1   | 14 x1<br>der(14)t(13;14)x1   | -<br>der(14)t(13;14)x1       |
| 15 | 15 x2                        | 15 x2                        | 15 x2                        |
| 16 | 16 x2                        | 16 x2                        | 16 x2                        |
| 17 | 17 x2                        | 17 x1                        | 17 x2                        |
| 18 | 18 x2                        | 18 x2                        | 18 x2                        |
| 19 | 19 x1<br>der(19)t(19;11;1)x1 | 19 x1<br>der(19)t(19;11;1)x2 | 19 x1<br>der(19)t(19;11;1)x1 |
| 20 | 20 x1                        | 20 x2                        | 20 x1                        |
| 21 | 21 x2                        | 21 x2                        | 21 x2                        |
| 22 | 22 x1                        | 22 x2                        | 22 x2                        |
| X  | X x2                         | X x2                         | X x2                         |

| Chromosome | Image 19<br>(n=42)           | Image 20<br>(n=44)      |
|------------|------------------------------|-------------------------|
| 1          | 1 x1<br>-<br>der(1)t(1;12)x1 | 1 x1<br>der(1)t(1;11)x1 |
| 2          | 2 x2                         | 2 x2                    |
| 3          | 3 x2                         | 3 x2                    |
| 4          | 4 x2<br>del(4q)x1            | 4 x2                    |
| 5          | 5 x2                         | 5 x2                    |
| 6          | 6 x2                         | 6 x2                    |

|    |                              |                              |
|----|------------------------------|------------------------------|
| 7  | 7 x1                         | 7 x1<br>der(7)t(7;20)x1      |
| 8  | 8 x2                         | 8 x2                         |
| 9  | 9 x2                         | 9 x2                         |
| 10 | 10 x2                        | 10 x2                        |
| 11 | 11 x1                        | 11 x1                        |
| 12 | 12 x1<br>der(12)t(11;12)x1   | 12 x2                        |
| 13 | 13 x1                        | 13 x1                        |
| 14 | 14 x1<br>der(14)t(13;14)x1   | 14 x1<br>der(14)t(13;14)x1   |
| 15 | 15 x1<br>der(15)t(15;20)x1   | 15 x2                        |
| 16 | 16 x2                        | 16 x2                        |
| 17 | 17 x2                        | 17 x2                        |
| 18 | 18 x2                        | 18 x2                        |
| 19 | 19 x1<br>der(19)t(19;11;1)x1 | 19 x1<br>der(19)t(19;11;1)x1 |
| 20 | 20 x1                        | 20 x2                        |
| 21 | 21 x2                        | 21 x2                        |
| 22 | 22 x1                        | 22 x2                        |
| X  | X x2                         | X x2                         |
